RESEARCH ARTICLE

# Integrative multi-omics framework for causal gene discovery in Long COVID

Sindy Pinero<sup>1\*</sup>, Xiaomei Li<sup>2</sup>, Lin Liu<sup>1</sup>, Jiuyong Li<sup>1</sup>, Sang Hong Lee<sup>3,4,5</sup>, Marnie Winter<sup>6</sup>, Thin Nguyen<sup>7</sup>, Junpeng Zhang<sup>8</sup>, Thuc Duy Le<sup>1\*</sup>

**1** UniSA STEM, University of South Australia, Adelaide, South Australia, Australia, **2** Agriculture and Food Institute, Commonwealth Scientific and Industrial Research Organisation, Marsfield, New South Wales, Australia, **3** Australian Centre for Precision Health, University of South Australia, Adelaide, South Australia, Australia, **4** UniSA Allied Health and Human Performance, University of South Australia, Adelaide, South Australia, Australia, **5** South Australian Health and Medical Research Institute (SAHMRI), University of South Australia, Adelaide, South Australia, Australia, **6** Future Industries Institute, University of South Australia, Adelaide, South Australia, Australia, **7** Applied Artificial Intelligence Institute, Deakin University, Melbourne, Victoria, Australia, **8** School of Engineering, Dali University, Dali, Yunnan, China

\* [sindy\\_licette.pinero@mymail.unisa.edu.au](mailto:sindy_licette.pinero@mymail.unisa.edu.au) (SP); [thuc.le@unisa.edu.au](mailto:thuc.le@unisa.edu.au) (TDL)

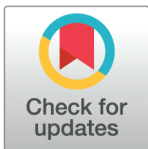

## OPEN ACCESS

**Citation:** Pinero S, Li X, Liu L, Li J, Lee SH, Winter M, et al. (2025) Integrative multi-omics framework for causal gene discovery in Long COVID. PLoS Comput Biol 21(12): e1013725. <https://doi.org/10.1371/journal.pcbi.1013725>

**Editor:** Boyang Ji, BioInnovation Institute, DENMARK

**Received:** May 8, 2025

**Accepted:** November 9, 2025

**Published:** December 1, 2025

**Copyright:** © 2025 Pinero et al. This is an open access article distributed under the terms of the [Creative Commons Attribution License](https://creativecommons.org/licenses/by/4.0/), which permits unrestricted use, distribution, and reproduction in any medium, provided the original author and source are credited.

**Data availability statement:** All relevant data are within the manuscript and its [Supporting Information](#) files. All processed data matrices, gene lists, statistical results, and analysis code required to replicate our findings are available on our

## Abstract

Long COVID, or Post-Acute Sequelae of SARS-CoV-2 infection (PASC), affects an estimated 10–20% of COVID-19 patients and presents persistent multisystemic symptoms. Although demographic and clinical factors, such as age, sex, and comorbidities, contribute to risk, the genetic mechanisms underlying this risk remain poorly defined. To address this gap, we developed a multi-omics framework that integrates Transcriptome-Wide Mendelian Randomization (TWMR), Control Theory (CT), Expression Quantitative Trait Loci (eQTL), Genome-Wide Association Studies (GWAS), RNA sequencing (RNA-seq), and Protein-Protein Interaction (PPI) network to identify putative causal genes and network drivers in Long COVID. Our approach prioritized 32 candidate genes, including 19 previously reported and 13 novel, with roles in the SARS-CoV-2 response, viral carcinogenesis, immune regulation, and cell cycle control. Enrichment analyses revealed a shared genetic architecture in syndromic, metabolic, autoimmune, and connective tissue disorders. Using causal gene expression profiles, we identified three distinct symptom-based subtypes of Long COVID, providing information on the heterogeneity of disease mechanisms and clinical presentation. Finally, we developed an open-source Shiny application for interactive exploration of these findings. Together, this integrative framework highlights novel causal mechanisms and therapeutic targets, advancing precision medicine strategies for Long COVID.

GitHub repository (<https://github.com/SindyPin/Causal-Multiomics-Method>) and as interactive results hosted on <https://sindypin.shinyapps.io/github/>.

**Funding:** This work was partly supported by the Australian Research Council Discovery Project under Grant DP230101122 (to LL, JL, and TDL) and the University Presidents Scholarship (UPS) stipend (to SP). The funders had no role in study design, data collection and analysis, decision to publish, or preparation of the manuscript.

**Competing interests:** The authors declare that they have no competing interests.

## Author summary

We developed a computational approach to understand why some individuals experience long-lasting symptoms after COVID-19 infection, a condition known as Long COVID that affects millions worldwide. Although physicians can identify patients with Long COVID, we do not yet fully understand which genes cause it or how to treat it effectively. We combined two powerful analytical methods to solve this problem: one that determines whether specific genes cause Long COVID (rather than just being associated with it), and another that identifies key control points in biological networks. Our analysis of genetic and molecular data identified 32 genes that are likely to cause Long COVID, including 13 that have not been previously linked to the condition. We discovered that Long COVID consists of three distinct subtypes in terms of different gene expression profiles, each with distinct symptoms and underlying biology. We also found that Long COVID shares genetic factors with other conditions, such as autoimmune and metabolic disorders, which may explain its diverse symptoms. To help other researchers and physicians employ our findings, we have created a free online tool that enables them to explore the data and potentially identify new treatment targets. Our work provides the first comprehensive genetic framework for understanding Long COVID and developing personalized treatments.

## Introduction

Long COVID, also known as Post-Acute Sequelae of COVID-19 (PASC), is a complex condition characterized by the persistence or onset of symptoms after SARS-CoV-2 infection. Long COVID is defined differently by various organizations. For example, the World Health Organization (WHO) and the Centers for Disease Control and Prevention (CDC) describe it as symptoms that persist three months after infection and last at least two months [1,2]. In contrast, the National Institute for Health and Care Excellence (NICE) considers it to start as early as one month after infection [3–6]. Regardless of the definition timing, key risk factors include age, sex, ethnicity, socioeconomic status, vaccination status, smoking, and underlying health conditions [7]. In addition, studies have linked various biomarkers to Long COVID, particularly those related to inflammation, immune dysfunction, and coagulation abnormalities [8].

Despite significant progress in identifying risk factors and clinical markers [7,8], understanding the role of gene expression as a causal factor in Long COVID remains a major challenge. This knowledge gap presents a significant barrier to the development and implementation of interventions and targeted therapies [9], highlighting the need for novel approaches that focus on gene expression patterns associated with Long COVID. Identifying these Long COVID-causing genes is essential for advancing targeted treatment strategies. It can also improve diagnostic accuracy and promote better monitoring and prediction of patient outcomes [10].

Computational methods for identifying disease-causing genes typically employ two primary strategies, each offering distinct advantages that complement each other.

The first strategy aims to identify genes associated with disease risk and prevention, often using approaches such as Transcriptome-Wide Mendelian Randomization (TWMR) [11]. The TWMR method incorporates transcriptomic data into MR studies utilizing genetic variants that influence gene expression, such as Quantitative Expression Trait Loci (eQTLs), to establish causal relationships between gene activity and disease. The TWMR methodology can identify whether altered gene expression directly influences an outcome (in this case, Long COVID) and reveal potential therapeutic targets. The resulting analysis reveals which genetic factors influence disease susceptibility or protection through genetic associations and causal inference, allowing researchers to identify specific genetic variants with direct causal effects on diseases. However, TWMR analysis often requires strong genetic instruments (e.g., single-nucleotide polymorphisms (SNPs) that robustly modulate gene expression), and determining causal relationships becomes more complex when confounding variables or pleiotropy are present.

The second strategy identifies genes or proteins that are crucial in biological networks. Techniques such as Bayesian Networks [12], Node Importance [13], and Control Theory (CT) [14] are used to understand how different genes and proteins interact within biological pathways, considering the interconnected nature of biological systems. CT is particularly useful for identifying critical nodes or key genes and proteins that significantly influence the entire network. Identifying these critical nodes (network driver genes) enables researchers to determine which components would be the most effective therapeutic targets for stabilizing or controlling disease-related disturbances. For example, CT methods have been utilized in cancer research to identify key regulatory genes, such as *TP53*, whose modulation can restore network stability, thus providing focused therapeutic opportunities [15].

In this study, we propose a novel framework to explore and discover potential genes involved in Long COVID by integrating two complementary strategies: MR [11] and CT [14], along with multi-omics data, including eQTLs, Genome-Wide Association Studies (GWAS), RNA sequencing (RNA-seq), and the human Protein-Protein Interaction (PPI) network. Our approach identifies candidate causal genes that may contribute to Long COVID risk and examines their potential regulatory roles within a network. Specifically, we discover genes whose expression patterns suggest either increased susceptibility to Long COVID or a crucial role in maintaining biological network stability. By integrating these methodologies and utilizing multi-omics data, our analysis provides comprehensive insights into the potential genetic mechanisms underlying Long COVID, highlighting candidate therapeutic targets for further investigation.

Our study has identified 32 potential causal genes for Long COVID, of which 19 have been confirmed by the existing literature, providing support for the effectiveness of our findings. The remaining genes represent promising candidates for follow-up experiments. Among these candidates, we identified genes that act as risk or protective factors, as well as network driver genes that regulate and stabilize the disease network's structure. Enrichment analyses revealed important biological pathways in Long COVID, including SARS-CoV-2 infection, viral carcinogenesis, cell cycle regulation, and immune response mechanisms. Using the identified potential causal genes, we clustered Long COVID patients into three distinct subtypes with different symptom profiles, establishing a foundation for personalized diagnostic and therapeutic approaches. This work represents a significant step toward customized management and treatment strategies for Long COVID, ultimately improving patient outcomes.

To facilitate the application of our framework, we developed a web application (a Shiny app) that allows users to generate gene lists by adjusting parameters for direct (MR) and network-based (CT) causal approaches. This tool provides researchers and clinicians with an accessible platform to explore parameter variations and analyze their data, enhancing the reproducibility of our findings.

## Materials and methods

### Overview of the causal gene discovery framework

The causal gene discovery framework integrates various data sources, including eQTL, GWAS, RNA-seq, and PPI networks, to identify genes with putative causal roles in Long COVID (Fig 1). It begins by processing multi-omics input data

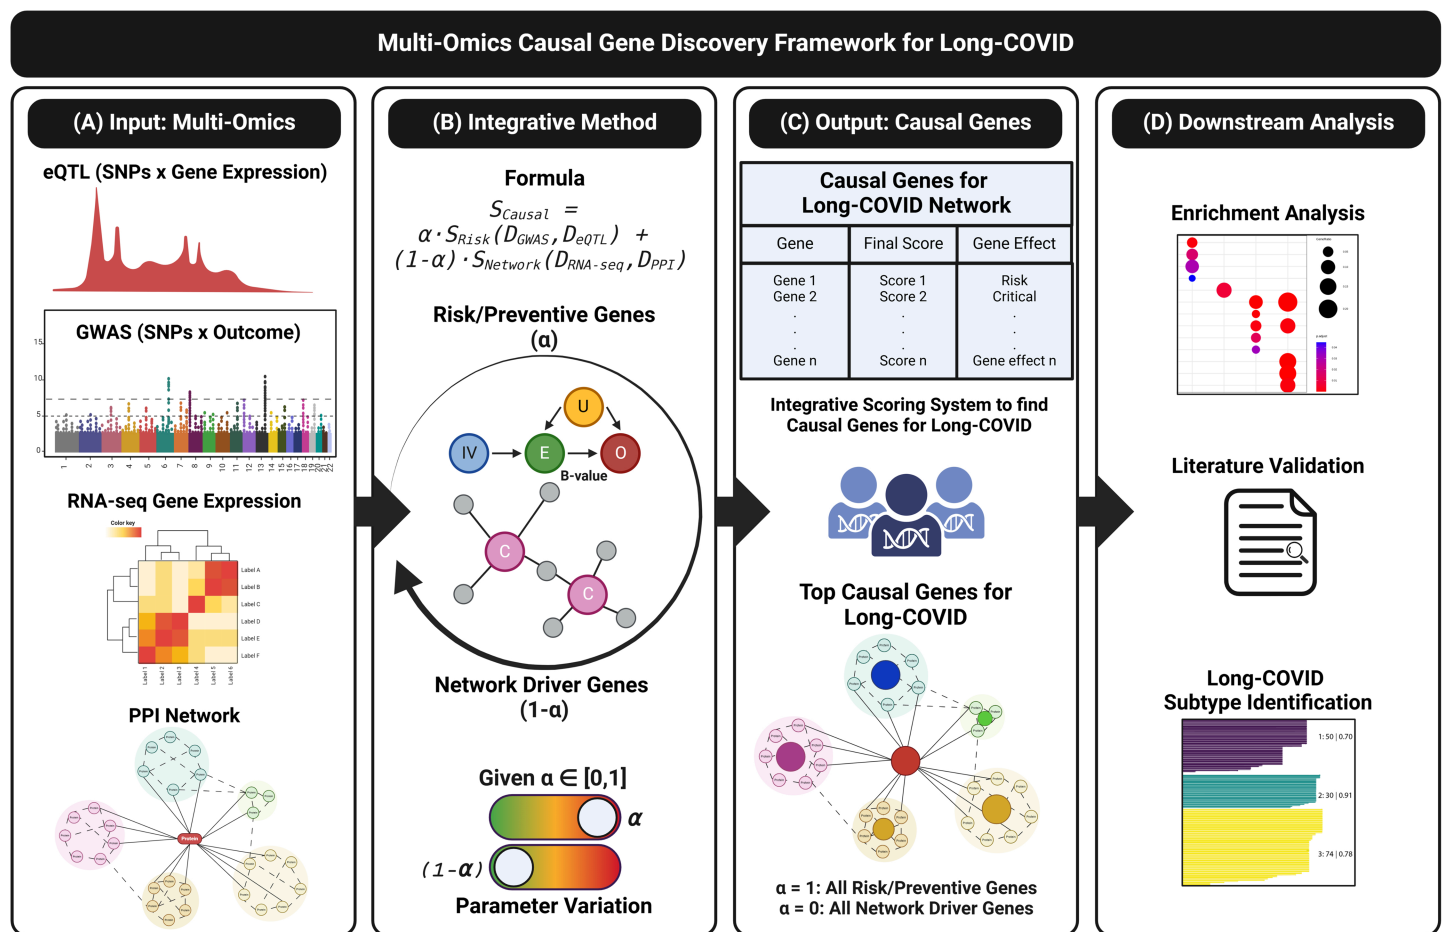

**Fig 1. A causal gene discovery framework for Long COVID using multi-omics data.** (A) The input data includes expression Quantitative Trait Loci (eQTL), Long COVID Genome-Wide Association Studies (GWAS), RNA sequencing (RNA-seq), and the human Protein-Protein Interaction (PPI) network. (B) A fusion approach to evaluating gene expression by integrating Transcriptome-Wide Mendelian Randomization (TWMR) and Control Theory (CT) scores. (C) Significant genes are ranked by their weighted scores. (D) Downstream analyses include Enrichment Analysis (EA), literature review, and the identification of Long COVID subtypes. SNPs: Single Nucleotide Polymorphisms, IVs: Instrumental Variables. E: Exposure. O: Outcome. U: Confounders. Created in BioRender. Piñero, S. (2025) <https://BioRender.com/6awyup6>.

<https://doi.org/10.1371/journal.pcbi.1013725.g001>

(Fig 1A) and then applies an integrative scoring method (Fig 1B) that combines TWMR with CT-based network analysis. This approach balances the contributions of risk and protective factors and of genes critical to the network through a parameter ( $\alpha$ ) that can be adjusted to accommodate both goals. The output (Fig 1C) ranks putative causal genes by weighted scores, offering insights into their roles within the Long COVID network. Finally, downstream analyses (Fig 1D), including Enrichment Analysis (EA), literature validation, and subtype identification, help discover disease mechanisms and prioritize therapeutic targets. This comprehensive computational approach integrates genetic and network-based perspectives, providing deeper insights into the nature of Long COVID.

By treating genetic variants as instrumental variables (IVs), two-sample MR methods estimate the effects of genetically regulated risk exposures for complex diseases using only summary statistics. When considering gene expression as exposure in TWMR analyses, we aim to identify gene expressions that have causal relationships with the disease of interest. In our case, we focus on identifying the genes that act as risk or protective factors for Long COVID. Given the limited number of eQTLs available as IVs for a gene, which makes it challenging to detect invalid IVs, we adopt the multi-tissue

approach, *Mt-Robin* [11]. This method uses eQTL data in a mixed model to identify IV-specific random effects arising from pleiotropy due to estimation errors in the eQTL summary statistics, allowing accurate inference of the dependence (fixed effects) between eQTL and GWAS effects, even in the presence of invalid IVs.

Although MR approaches identify genes that directly affect Long COVID, network biology approaches, such as CT, have shown that the genes driving the disease are not limited to those directly linked to the disease phenotypes [14]. In this work, we employ a CT approach to extract a list of genes that serve as network drivers for Long COVID—i.e., genes whose removal or intervention would disrupt the biological networks associated with the disease, thereby affecting disease outcomes. These network driver genes may or may not have direct causal relationships with the disease.

To create a comprehensive list of putative causal genes for Long COVID and to understand their roles in disease regulation, we use a fusion approach that integrates the two methods described above (see Framework subsection for details). Specifically, we calculate the scores for each gene using the following formula:

$$S_{\text{Causal}} = \alpha \cdot S_{\text{Risk}}(D_{\text{GWAS}}, D_{\text{eQTL}}) + (1 - \alpha) \cdot S_{\text{Network}}(D_{\text{RNA-seq}}, D_{\text{PPI}}) \quad (1)$$

where:

- $S_{\text{Causal}}$  represents the final score of each gene.
- $S_{\text{Risk}}(D_{\text{GWAS}}, D_{\text{eQTL}})$  is the score derived from the TWMR approach (*Mt-Robin*) to identify putative causal risk and protective genes using GWAS and eQTL datasets.
- $S_{\text{Network}}(D_{\text{RNA-seq}}, D_{\text{PPI}})$  is the CT approach score to identify network driver genes based on RNA-seq data and the human PPI network.
- The parameter  $\alpha$  controls the contribution of each risk/protective putative causal gene, while  $1 - \alpha$  adjusts the influence of each network-critical gene.

The formula (1) integrates an approach that ranks genes by combining their causal effects and significance within the Long COVID network, providing a comprehensive prioritization based on both causal and network properties.

Thus, this causal multi-omics approach provides insights into the genetic mechanisms underlying Long COVID and highlights potential intervention targets.

### Dynamic visualization of Long COVID putative causal genes: A shiny application

In our model, the parameter  $\alpha$  serves as an adjustable coefficient that enables researchers to explore different scenarios for prioritizing protein-coding genes based on their roles in influencing disease risk or prevention and controlling the Long COVID network.

As  $\alpha$  approaches 1, the model prioritizes genes associated with disease risk and protective scenarios. These genes are directly associated with the pathogenesis of Long COVID, highlighting potential therapeutic targets for intervention.

In contrast, as  $\alpha$  approaches 0, the model emphasizes driver genes critical to the structure of the disease network. These genes regulate key interactions within the network, positioning them as potential therapeutic targets to restore lost stability or modulate pathological states.

The model integrates both perspectives across the intermediate range of  $\alpha$ , balancing network controllability and disease risk. In this case, genes that significantly influence the network and are closely related to disease risk become key players, making them important targets for further investigation.

Researchers can dynamically explore these shifts in gene rankings by adjusting  $\alpha$  in our interactive tool available at <https://sindypin.shinyapps.io/github/>. This instrument allows a detailed examination of how genes transit from disease risk or protective factors ( $\alpha \rightarrow 1$ ) to network drivers ( $\alpha \rightarrow 0$ ).



## Input data collection and preparation

The success of our integrative multi-omics framework relies on the careful selection and preparation of diverse datasets that capture Long COVID's genetic, transcriptomic, and proteomic dimensions. We collected and curated high-quality data from publicly available resources, ensuring robust coverage of key biological processes. These datasets include cis-eQTL information from the Genotype-Tissue Expression (GTEx) project [16], GWAS findings for Long COVID susceptibility [17], Whole Genome Sequencing (WGS) for Linkage Disequilibrium (LD) analysis [16], and gene-level data from Ensembl [18]. Additionally, an RNA-seq dataset [19] and the human PPI network were incorporated to provide a comprehensive view of gene expression and functional interactions. The following subsections detail the sources, characteristics, and preparation steps for each dataset used in our analysis.

**Expression Quantitative Trait Loci (eQTL).** We utilized 49 significant cis-eQTL datasets, each within a 1Mb region and meeting a False Discovery Rate (FDR) threshold of  $< 0.05$ , obtained from the GTEx project (Version 8, Ensembl 99, GRCh38) [16]. These datasets comprise 39,832 unique genes derived from nearly 1,000 healthy European individuals, accessed on 9 August 2023. They were crucial for investigating the relationship between genetic variation and gene expression across different human tissues (S1 Text). For more details and a description of the datasets available in the GTEx consortium, refer to the original publication [20].

**Genome-Wide Association Studies (GWAS).** We sourced a Long COVID GWAS dataset (Release 7; Ensembl 109; HGB GRCh38) from Lammi *et al.*, 2025 [17]. This dataset consists of 3,018 cases evaluated for 19 symptoms three months post-COVID-19 infection according to WHO and CDC definitions of Long COVID [1,2], and 1,093,995 broad controls from the general population who were not specifically evaluated for post-COVID symptoms across six ancestries. For comprehensive details, including the complete list of ancestries, symptoms, and unique SNPs, please refer to S2 Text.

**Whole Genome Sequencing (WGS).** To ensure the robustness and validity of our method, we calculated the LD matrix using GTEx WGS BAM files (Ensembl 88, GRCh38), which contain 820,792 unique SNPs from 836 male and female European individuals (S3 Text). Access to this specific dataset was granted through special permission [16].

For the calculation of the LD matrix, we utilized GTEx-EUR BAM files as our primary reference panel [16]. Users of our method can replace this reference with ancestry-matched panels as needed for their specific research contexts, thereby improving the precision of LD estimation in non-European populations.

**Human genes dataset.** To assess the causal relationship of each gene with the outcome, we utilized the public Human Genes dataset from the Ensembl Genes database (version 110, GRCh38), which contains 70,116 genes [18].

**RNA Sequencing (RNA-seq).** Moreover, we analyzed RNA-seq gene expression data from the Mount Sinai COVID-19 Biobank Study [21]. The dataset comprises patients with Long COVID symptoms (persisting for more than one month post-acute infection, following established institutional criteria [4–6]), COVID-19 patients, and healthy controls. We sourced this dataset from the Gene Expression Omnibus - National Center for Biotechnology Information (GEO-NCBI) database, under the identifier GSE215865, corresponding to the Ensembl GRCh37 release [19]. It contains 413 blood samples from 158 individuals with Long COVID (S4 Text).

**Protein-Protein Interaction (PPI).** Finally, we employed the human PPI dataset published by Vinayagam *et al.*, 2011 [22] as a model to build the Long COVID network (S5 Text).

## Framework

To create a comprehensive list of putative causal genes for Long COVID and to understand their roles in disease regulation, we used a fusion approach integrating MR and CT. Specifically, we calculated the scores of each gene using the formula in Eq 1. This approach produced a final ranking of genes based on their direct causal relationships and significance within the Long COVID network. The following sections detail the calculations of  $S_{\text{Risk}}$  and  $S_{\text{Network}}$ .

**Calculating  $S_{\text{Risk}}$ .** To calculate  $S_{\text{Risk}}$ , we employed the *Mt-Robin* method [11] to identify genes that act as risk or protective factors for Long COVID. Using GWAS ( $\mathbf{D}_{\text{GWAS}}$ ) and eQTL ( $\mathbf{D}_{\text{eQTL}}$ ) data (see the Overview Section), this

approach accurately infers the dependence (fixed effects) between eQTL and GWAS effects, even with potential invalid IVs.

We first constructed and refined the LD matrix using SNPs from our dataset to ensure robust genetic instruments. We calculated pairwise  $r^2$  values and applied an LD 0.5 threshold to filter highly linked SNPs. Our multi-criteria SNP selection process eliminated those with multiple correlations above the LD threshold, prioritized SNPs present across multiple tissues with consistent effect directions, and selected significant SNPs with the smallest minimum p-values. In addition, we required genes to be expressed in at least one tissue.

Statistical analysis involved reverse regression coefficients and weighted regression with random slopes and correlated errors. We integrated these results with GWAS standard errors and the refined LD matrix to inform our resampling strategy. We evaluated causal relationships using bootstrapping to generate null distributions while preserving the SNP LD structure. We resampled GWAS effect sizes for each gene, preserving LD correlations, and calculated test statistics under the null hypothesis of no association. The p-value for each gene was determined by the proportion of null test statistics exceeding the observed value, excluding samples with non-convergence or singular fits in the mixed-effects model.

The final score was calculated using the absolute effect size ( $\beta_y$ ) from the MR method. Genes with a p-value or FDR greater than 0.05 received a score of 0, ensuring only significant causal effects. We normalized the MR score ( $S_{\text{Risk}}$ ) using min-max scaling for cross-gene comparability:

$$\begin{aligned} S_{\text{Risk}} &= S_{\text{MR\_norm}} \\ &= \frac{S_{\text{MR}} - \min\{S_{\text{MR}}\}}{\max\{S_{\text{MR}}\} - \min\{S_{\text{MR}}\}} \end{aligned} \quad (2)$$

where  $S_{\text{MR}}$  represents the size of each gene's causal effect, and  $\min(S_{\text{MR}})$  and  $\max(S_{\text{MR}})$  are the smallest and largest values in all genes, respectively.

Finally, we estimated FDR-corrected p-values to identify significant putative causal contributors to Long COVID (p-value < 0.05).

**Calculating  $S_{\text{Network}}$ .** To calculate  $S_{\text{Network}}$ , we integrated RNA-seq expression data from Long COVID patients and the human PPI network described in the Overview Section. RNA-seq data revealed disease-specific gene expression patterns, while the PPI network provided structural relationships among proteins. Together, these datasets allowed us to identify and classify driver nodes that control the biological network underlying Long COVID.

Network analysis involved constructing a directed graph in which nodes represent genes and edges indicate protein interactions. We first mapped the RNA-seq expression data to the PPI network to identify which genes were expressed in Long COVID patients and how they interacted. This integration allowed us to assess the control-theoretic properties of each gene within the specific context of Long COVID, rather than in a general PPI network.

We then classified genes by removing each from the network and observing changes in the number of required driver nodes needed for control [14]. This process identified three categories: indispensable genes (requiring an increase in driver nodes), neutral genes (showing no significant change), and dispensable genes (exhibiting minimal impact). We focused our analyses on indispensable genes due to their critical role in maintaining network control. Dispensable genes were excluded from further analysis because they do not significantly contribute to the network's control structure and would not decrease the number of drivers required for full network controllability.

We further refined indispensable genes into Type-I and Type-II classifications based on their network behavior. Type-I genes were categorized based on their effects on other driver nodes. Critical genes were those whose removal increased the number of required driver nodes, particularly by disrupting directed paths connecting regulatory nodes to their downstream targets. Redundant genes reduced the number of required driver nodes, whereas ordinary genes did not.

Type-II genes were classified according to their control requirements: critical genes (zero in-degree,  $K_{\text{in}} = 0$ ) appeared in all driver node sets, redundant genes in none, and ordinary genes in some but not all.

We analyzed network connectivity using three measures:  $K$  (total degree), which represents total interactions and indicates network centrality;  $K_{in}$  (in-degree), which shows incoming interactions that other genes could regulate; and  $K_{out}$  (out-degree), which indicates outgoing interactions that influence different genes.

To address potential bias concerns in our network analysis, we emphasize that our approach ranks genes based on their total degree ( $K$ ) and functional classification, rather than favoring genes in larger network structures. This approach ensures that genes are prioritized based on their individual network properties and control-theoretic importance, objectively identifying the most influential nodes regardless of local network density.

The CT score ( $S_{CT}$ ) incorporated these classifications with weighted importance. Type-I critical genes were assigned a weight of 1 because they are essential for network stability. Type-II critical genes received a weight of 2 as they must always be controlled ( $K_{in} = 0$ ). Redundant and ordinary genes received a weight of 0, reflecting their non-critical roles.

We calculated  $S_{CT}$  by multiplying the total degree of each gene ( $K$ ) by its assigned weighted score ( $W$ ):

$$S_{CT} = K \times W \quad (3)$$

where  $S_{CT}$  represents the network impact score for each gene calculated from its degree and weight.

The final score was normalized using the min-max scaling as follows:

$$\begin{aligned} S_{Network} &= S_{CT\_norm} \\ &= \frac{S_{CT} - \min\{S_{CT}\}}{\max\{S_{CT}\} - \min\{S_{CT}\}} \end{aligned} \quad (4)$$

where  $\min(S_{CT})$  and  $\max(S_{CT})$  are the smallest and largest values across all genes, respectively.

**Polygenic risk score integration analysis.** To enhance the translational impact of our findings, we integrated our 32 Long COVID putative causal genes with existing COVID-19 PGS datasets from the PGS Catalog [23]. We analyzed three available COVID-19 PGS datasets: PGS002272 (6 genome-wide significant variants), PGS002273 (12 genome-wide significant variants), and PGS004938 (955,417 variants using the LDpred2 method [24]), representing the current state of COVID-19 genetic risk prediction models.

We employed transcription start site (TSS)-based mapping with LD clumping (a 200kb window) and a conservative nearest-gene assignment ( $\pm 50$ kb window) to map PGS variants to genes. For PGS004938, we applied the 97.5th percentile filtering to retain high-confidence variants. Gene mapping used UCSC RefSeq annotations (GRCh38) with strand-aware TSS positioning [25]. Statistical enrichment was assessed using Fisher's exact test to determine whether the overlap between PGS and Long COVID genes exceeded the expected by chance. The distance analysis calculated the minimum distance from each Long COVID gene's TSS to the nearest COVID-19 PGS variant. Complete methodological details and sensitivity analyses are provided in [S6 Text](#).

**Analysis of shared genetic basis between Long COVID and related conditions.** Disease-gene associations were compiled using five complementary databases: MalaCards [26], DISEASES [27], DISGENET [28], MedGen [29], and GenCC [30]. We systematically queried these databases for conditions associated with our identified genes, focusing on pathophysiological features that overlapped with Long COVID manifestations. Selection criteria included: (1) presence of immune/inflammatory components, (2) chronic/persistent symptoms, (3) multi-system involvement, and (4) metabolic or endocrine disruption. Conditions were categorized based on their primary pathophysiological mechanisms and potential relevance to the pathogenesis of Long COVID. The selection of the database was based on a comprehensive coverage of rare and common conditions, including mechanistic annotations and regular curation of disease-gene relationships. The complete dataset of conditions and their database sources is provided in [S7 Table](#).

**Enrichment Analysis (EA).** Our study conducted a comprehensive pathway EA on the risk, protective, and network driver genes identified from our framework. The aim was to identify the Biological Processes (BP), Cellular Components



(CC), and Molecular Functions (MF) that are significantly associated with these genes. To ensure compatibility with various bioinformatics tools, we initially mapped Ensembl gene IDs to Entrez gene IDs using the org.Hs.eg.db database [18].

For the EA, we applied the 32 genes identified by our framework, which included all overlapping and non-overlapping genes from analyses conducted at multiple  $\alpha$  parameter settings ( $\alpha = 0, 0.25, 0.50, 0.75, 1$ ). The genes derived from the Mt-Robin analysis included all significant genes, whereas the CT analysis produced the top 16-ranked genes based on their network properties. This selection approach ensured that our EA captured the biological processes associated with genes identified across the entire spectrum of our computational framework, from purely statistical causal inference ( $\alpha = 0$ ) to a purely network-based ( $\alpha = 1$ ) approach.

We utilized well-established databases (GO [31], KEGG [32], and Reactome [33]). We prioritized enriched pathways based on statistical significance and their relevance to the established literature on Long COVID. The pathways were considered significant when they met all threshold criteria (p-value, p-adjusted, and q-value  $< 0.05$ ).

Furthermore, we examined the Long COVID context by conducting a comprehensive literature review to identify potential symptoms associated with each enriched pathway, providing additional insights into the disease's possible clinical implications.

We visualized the results using dot and network plots, which clearly and intuitively represented enriched terms and molecular pathways.

**Gene expression clustering.** We investigated Long COVID subtypes using gene expression data from the risk, protective, and network driver genes we identified. We determined the optimal number of clusters using the CancerSubtype package's ConC algorithm [34], an unsupervised method for subtype discovery. The analysis utilized RNA-seq data, as detailed in the Input Data Section. Moreover, we performed a grid search across hyperparameters, evaluating 2 to 5 clusters with a fixed seed of 5 for reproducibility.

After optimizing the clustering parameters, we grouped patients with Long COVID using the selected CC configuration. The cluster quality assessment involved calculating the silhouette widths of individual and group members. We selected the final number of clusters based on the highest Average Silhouette Width (ASW) and the balanced distribution of individuals between clusters. This clustering enabled mapping clinical data to analyze symptom prevalence within each subtype.

To assess cluster-specific symptom patterns, we conducted statistical tests of significance. We applied Chi-square tests when the expected cell counts in the contingency tables exceeded 5. We used Fisher's exact test for cells with lower expected counts, simulated p-values (workspace: 2e8) for symptoms, and simulated Chi-square tests for other clinical variables. Statistical significance was set at p-value  $< 0.05$ .

We then calculated symptom frequencies in both absolute counts and relative percentages for each cluster, visualizing these distributions through comparative heatmaps.

More details about the entire framework can be found in [S7 Text](#).

## Results

### Putative causal genes of Long COVID

By varying the  $\alpha$  values in our model, we identified a comprehensive set of putative causal genes for Long COVID, each with distinct roles. [Fig 2](#) shows the sets of these causal genes that correspond to specific values of  $\alpha$ . As  $\alpha$  approaches 1, the model outputs genes classified as risk (red) or protective (green), inferred from the color coding of their effect sizes, where red represents positive effect sizes (risk) and green represents negative effect sizes (protective), decreasing  $\alpha$  towards zero shifts the focus to network driver genes that control the Long COVID PPI network (yellow).

Genes such as membrane occupation and recognition nexus repeat containing 4 (*MORN4*), cell division cycle associated 26 (*CDC26*), and eukaryotic translation initiation factor 5A (*EIF5A*) consistently rank highly across different  $\alpha$  values (1.00 to 0.50), suggesting a strong causal relationship between their expression levels and disease risk or protective mechanisms. Using SNPs as IVs in our analysis, we estimated the causal effects of gene expression on the Long

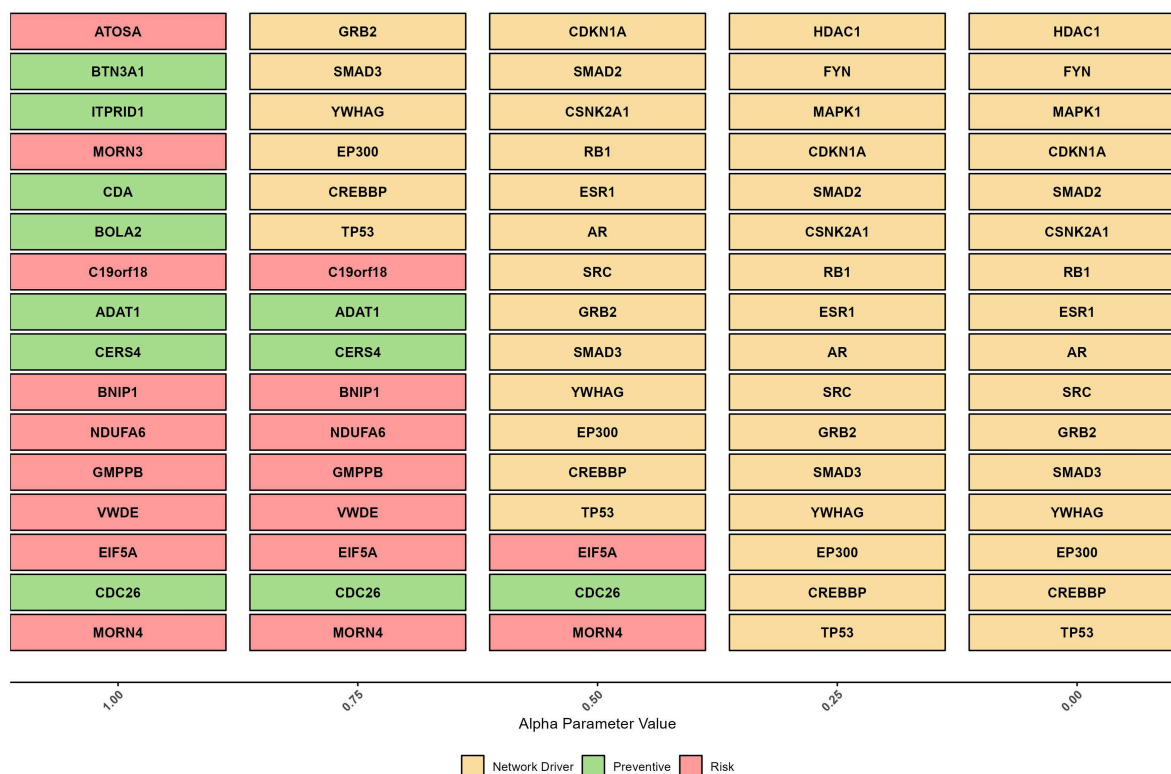

**Fig 2. Top putative causal genes ranked by their final score  $S_{\text{causal}}$ .** These genes, obtained from our framework, are sorted horizontally based on their absolute effect size in ascending order and classified vertically across different  $\alpha$  values. The parameter  $\alpha$  balances the direct effect of genes on the disease ( $S_{\text{Risk}}$ ) and their network controllability roles ( $S_{\text{Network}}$ ). At  $\alpha = 1$ , the model outputs disease risk (red) and protective (green) genes. As  $\alpha$  decreases towards 0, the focus shifts to network driver genes that control the biological system (yellow).

<https://doi.org/10.1371/journal.pcbi.1013725.g002>

COVID risk. The consistently high ranking of *MORN4*, *CDC26*, and *EIF5A* suggests that their expression levels can significantly contribute to disease susceptibility, making them potential key targets for intervention strategies aimed at reducing disease risk (see Fig 2). The complete list of SNPs used as IVs for each gene's expression is provided in S2 Table.

As  $\alpha$  decreases, the model shifts focus from the MR approach to the CT perspective, prioritizing the balance between risk-related genetic contributions and network control dynamics. This transition highlights the framework's flexibility in integrating these two viewpoints. Notably, genes such as tumor protein p53 (*TP53*), cyclic adenosine monophosphate response element-binding protein-binding-protein (*CREBBP*), early region 1A binding protein p300 (*EP300*), tyrosine 3-monooxygenase/tryptophan 5-monooxygenase activation protein gamma (*YWHAG*), SMAD family member 3 (*SMAD3*), and the growth factor receptor-bound protein 2 (*GRB2*) become increasingly crucial in the network, emphasizing their roles in maintaining network control (see Fig 2, with these genes highlighted in yellow).

When considering the union of the top genes for each  $\alpha$  value in our analysis, we identified 32 unique putative causal genes for Long COVID. This comprehensive set of genes represents the most influential factors in the spectrum of our parameter  $\alpha$ , which balances disease-related impact and network controllability.

Of these 32 genes, 19 have been previously identified in COVID-19 and/or Long COVID studies, reinforcing their importance in the disease process. These include well-known genes such as the androgen receptor (*AR*), butyrophilin subfamily 3 member A1 (*BTN3A1*), cyclin-dependent kinase inhibitor 1A (*CDKN1A*), *CREBBP*, *EIF5A*, *EP300*, estrogen receptor 1 (*ESR1*), atos homolog A (*ATOSA*), FYN proto-oncogene (*FYN*), *GRB2*, histone deacetylase 1 (*HDAC1*), mitogen-activated protein kinase 1 (*MAPK1*), NADH:ubiquinone oxidoreductase subunit A6 (*NDUFA6*), retinoblastoma

transcriptional corepressor 1 (*RB1*), SMAD family member 2 (*SMAD2*), *SMAD3*, sarcoma proto-oncogene (*SRC*), *TP53*, and *YWHAG*. These genes have been associated with various aspects of SARS-CoV-2 infection and Long COVID, including roles as hub genes, drug targets, and factors that influence disease severity (Table 1). The high number of confirmed Long COVID genes suggests that our framework effectively identifies putative causal genes.

The remaining 13 genes in our putative causal set represent novel discoveries for COVID-19 and Long COVID research: adenosine deaminase tRNA-specific 1 (*ADAT1*), B-cell lymphoma 2 interacting protein 1 (*BNIP1*), boe-like 2 (*BOLA2*), chromosome 19 open reading frame 18 (*C19orf18*), inositol 1,4,5-trisphosphate receptor interacting domain containing 1 (*ITPRID1*), *CDC26*, cytidine deaminase (*CDA*), ceramide synthase 4 (*CERS4*), casein kinase-2  $\alpha$ -1 (*CSNK2A1*), GDP-mannose pyrophosphorylase B synthase (*GMPPB*), MORN repeat containing 3 (*MORN3*), *MORN4*, and the von Willebrand factor D and EGF domains gene (*VWDE*). These previously unlinked genes demonstrate the potential of our framework to reveal novel intervention targets.

EA of these 32 putative causal genes identified 458 significant pathways in GO (Gene Ontology) [31], 99 in KEGG (Kyoto Encyclopedia of Genes and Genomes) [32], and 246 in Reactome [61]. The top 20 pathways in each database, ranked by adjusted p-value, are shown in Fig 3, with the complete list available in the S4 Table.

Key findings include the transforming growth factor (TGF)- $\beta$  signaling pathway, highlighted in GO and KEGG analyses, which plays a crucial role in immune regulation and tissue repair. Its disruption may contribute to persistent inflammation and fibrosis, leading to lung and organ damage, as observed in Long COVID patients [38]. Similarly, KEGG pathways, such as the cell cycle and viral carcinogenesis, suggest long-term cellular effects of SARS-CoV-2 infection, including abnormal proliferation and senescence, which potentially explain prolonged recovery and tissue dysfunction [53].

GO analysis highlights the importance of immune signaling pathways in ongoing inflammation and autoimmune-like symptoms [62]. Reactome analysis emphasizes Forkhead box O (FOXO) transcription and phosphatidylinositol 3-kinase (PI3K)/protease B (AKT) signaling, which are involved in metabolism, stress responses, cell survival, and growth factor signaling pathways that can affect tissue repair and regeneration [38,41].

These findings reveal potential mechanisms underlying Long COVID and suggest therapeutic targets, such as TGF- $\beta$  signaling and FOXO transcription, to mitigate long-term effects.

**Table 1. Core putative causal genes for Long COVID confirmed by the literature.** These 19 genes were validated by existing COVID-19 (COV) and/or Long COVID (LCV) studies, reinforcing our findings. Literature validations include studies on severity (Sev.), regulation (Reg.), and polymorphisms (Polymo.). For more supporting literature, refer to S3 Table.

| Gene          | Primary Findings                                                 | COV  | LCV  |
|---------------|------------------------------------------------------------------|------|------|
| <i>AR</i>     | Hub Gene, Drug Target, COVID-19 Severity                         | [35] | -    |
| <i>ATOSA</i>  | Downregulated in COVID-19                                        | [36] | -    |
| <i>BTN3A1</i> | Predictive Marker                                                | [37] | -    |
| <i>CDKN1A</i> | Key Regulator, Drug Target                                       | [38] | [39] |
| <i>CREBBP</i> | Hub/Drug Target                                                  | [40] | [41] |
| <i>EIF5A</i>  | Drug Target                                                      | [42] | -    |
| <i>EP300</i>  | Hub/Drug/Vaccine Target, COVID-19 Severity, Epigenetic Regulator | [43] | [44] |
| <i>ESR1</i>   | Hub/Drug Target, Herpes Zoster Association                       | [45] | -    |
| <i>FYN</i>    | Hub/Drug Target                                                  | [46] | -    |
| <i>GRB2</i>   | Drug Target                                                      | [47] | -    |
| <i>HDAC1</i>  | Drug Target, Epigenetic Regulation                               | [48] | [49] |
| <i>MAPK1</i>  | Hub/Drug Target                                                  | [50] | -    |
| <i>NDUFA6</i> | Drug Target                                                      | [51] | -    |
| <i>RB1</i>    | Hub Gene, SARS-CoV-2 Oncogenesis, Genetic Polymorphism           | [52] | [53] |
| <i>SMAD2</i>  | Hub/Drug Target                                                  | [54] | [54] |
| <i>SMAD3</i>  | Drug Target, Virus-host Interaction                              | [55] | -    |
| <i>SRC</i>    | Drug Target, Virus-host Interaction                              | [56] | [57] |
| <i>TP53</i>   | Hub/Drug/Vaccine Target, Critical Gene                           | [58] | [59] |
| <i>YWHAG</i>  | Hub/Vaccine Target, COVID-19 Neurotropism                        | [60] | -    |

<https://doi.org/10.1371/journal.pcbi.1013725.t001>

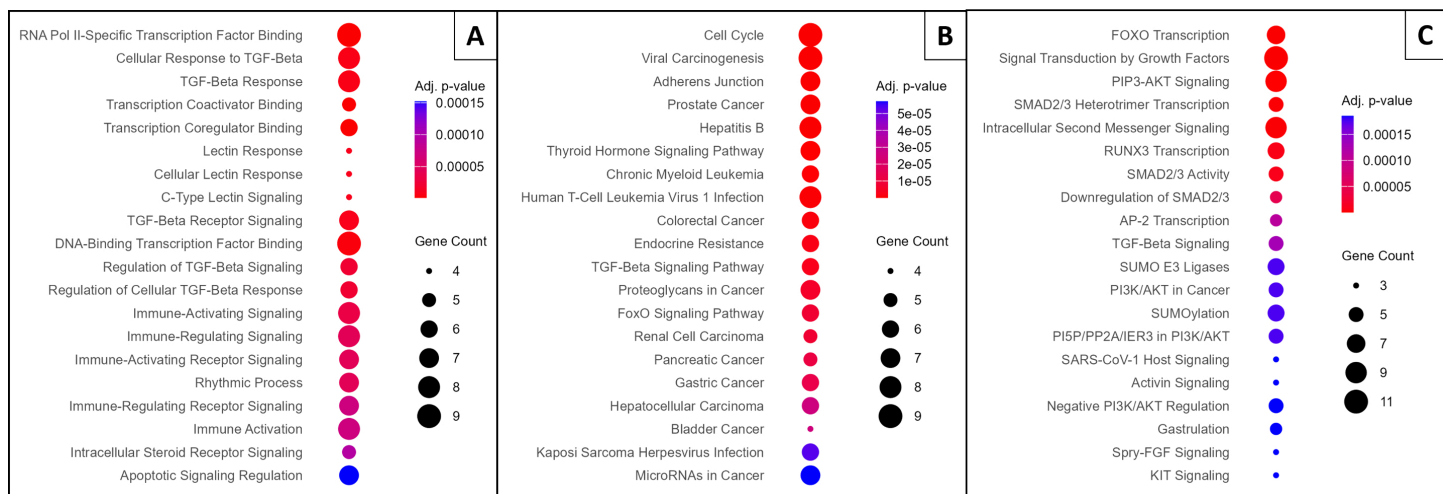

**Fig 3. Enrichment analysis (EA) results for the identified Long COVID putative causal genes.** (A) Gene Ontology (GO) EA, showing the top 20 enriched terms across Biological Process (BP) and Molecular Function (MF) categories. (B) KEGG pathway EA, displaying the top 20 enriched pathways. (C) Reactome pathway EA, illustrating the top 20 enriched pathways. For all plots, genes are ranked by the lowest adjusted p-value. The y-axis represents the enriched terms or pathways, the size of each dot reflects the number of associated genes, and the color gradient indicates the adjusted p-value, with blue denoting greater significance.

<https://doi.org/10.1371/journal.pcbi.1013725.g003>

**Integration with COVID-19 polygenic risk scores.** To assess the translational potential and genetic overlap between Long COVID and acute COVID-19 susceptibility, we compared our 32 putative causal genes with existing COVID-19 polygenic risk score (PRS) datasets. This analysis aimed to determine whether the Long COVID genes could be incorporated into current genetic risk prediction models or represent distinct pathophysiological mechanisms.

TSS-based mapping identified 3,190 unique genes from the combined PGS datasets. Direct comparison with our 32 Long COVID genes revealed minimal overlap, with only three genes (9.4%) showing concordance: *ITPRID1*, *GRB2*, and *CDA* (Fisher's exact test,  $p = 0.72$ ).

The three overlapping genes demonstrate biological plausibility for the pathogenesis of Long COVID. *ITPRID1* contains domains that interact with IP3 receptors, which are critical for calcium signaling pathways essential for immune cell activation and viral responses [63,64]. *GRB2* has been identified as a potential drug target in COVID-19 due to its role in inflammatory signaling pathways [47]. *CDA*, involved in nucleotide metabolism and immune cell function, has been associated with therapeutic responses in inflammatory conditions [65].

Distance analysis revealed that 22% (7/32) of our Long COVID genes were within 50 kb of COVID-19 PGS variants, and 34% (11/32) within 100 kb, indicating that 66% of our identified genes operate beyond the typical cis-regulatory range captured by current PGS models. The limited overlap indicates that 90.6% of our genes represent distinct genetic mechanisms not currently captured by the COVID-19 susceptibility PGS, suggesting that Long COVID involves fundamentally different genetic architectures than those associated with acute COVID-19 risk. The complete results are provided in the [S6 Text](#).

**Shared genetic basis of Long COVID and related conditions.** We examine the involvement of the 32 putative causal genes identified for Long COVID in other pathophysiological conditions ([Table 2](#), complete data set in [S1 Table](#)). This analysis revealed several distinct patterns of disease overlap, curated from multiple disease databases, including The Human Disease Database (MalaCards), Disease-Gene Associations (DISEASES), The Gene-Disease Network (DisGeNET), Medical Genetics Database (MedGen), and the Gene Curation Coalition (GenCC) (see the Methods section for more information about these databases). Many of these genes are implicated in a spectrum of syndromic, metabolic,

**Table 2. Putative causal genes in Long COVID and their overlap with other pathophysiological conditions.** Analysis reveals the involvement of these genes in related diseases, suggesting shared mechanistic pathways underlying Long COVID manifestations.

| Gene           | Pathophysiological Conditions                          | Long-COVID Overlap                                                                       | Databases*        |
|----------------|--------------------------------------------------------|------------------------------------------------------------------------------------------|-------------------|
| <i>ADAT1</i>   | Developmental syndromes                                | Neurological and systemic involvement; persistent fatigue and cognitive dysfunction [68] | MC; D             |
| <i>AR</i>      | ID, metabolic and endocrine disorders                  | Immune dysregulation and sustained inflammatory responses [68]                           | MC; D             |
| <i>BTN3A1</i>  | AD, neurologic and chronic pulmonary conditions        | Persistent inflammation and tissue-specific immune dysregulation                         | MC; D             |
| <i>CDA</i>     | ID, hematologic, CTD                                   | Chronic immune activation, endothelial dysfunction                                       | DG; MG; MC; D     |
| <i>CDKN1A</i>  | Metabolic, AD, dev. and tumor-predisposition syndromes | Prolonged inflammatory states [8]                                                        | MC; D             |
| <i>CERS4</i>   | MetS, CV disease, Turner syndrome                      | Metabolic and vascular complications [67,68]                                             | DG; MC; D         |
| <i>CREBBP</i>  | Dev/epigenetic syndromes with immune involvement       | Epigenetic dysregulation, persistent inflammation [8]                                    | MC; D; MG; DG; GC |
| <i>CSNK2A1</i> | ID, inflammatory syndromes                             | Extended immune hyperactivity [8]                                                        | MC; D; MG; DG; GC |
| <i>EIF5A</i>   | MetS, ATD, vascular disease                            | Chronic inflammation, endothelial dysfunction                                            | MC; D; MG; DG; GC |
| <i>EP300</i>   | Dev/epigenetic syndromes, AD disorders                 | Epigenetic and immune dysregulation                                                      | MC; D; MG; DG; GC |
| <i>FYN</i>     | AD, vascular, inflammatory conditions                  | Immune hyperactivity, vascular lesions [67]                                              | MC; D             |
| <i>GMPPB</i>   | Metabolic, CMS, glycosylation defects                  | Energy metabolism defects, chronic inflammation [67]                                     | DG; MC; GC        |
| <i>GRB2</i>    | Chronic myeloproliferative, ID, MetS                   | Sustained cytokine dysregulation                                                         | DG; MC; D         |
| <i>HDAC1</i>   | ID, metabolic, inflammatory syndromes                  | Persistent immune activation                                                             | DG; MC            |
| <i>MAPK1</i>   | AD, CV, neurodevelopmental disorders                   | Prolonged inflammation, CV risk [67]                                                     | MG; DG; MC; GC    |
| <i>NDUFA6</i>  | Mitochondrial dysfunction, vascular disease            | Energetic deficits, POTS-like symptoms [66,68]                                           | MC; D             |
| <i>RB1</i>     | Tumor predisposition, ID features                      | Immune dysregulation, systemic impairment                                                | MC                |
| <i>SMAD2</i>   | AD (IBD), CTD, vascular disease                        | Tissue fragility, chronic inflammation                                                   | MC; D; MG; DG; GC |
| <i>SMAD3</i>   | AD, CTD, multi-system inflammation                     | Endothelial, skeletal, immune pathways                                                   | MC; D; MG; DG; GC |
| <i>SRC</i>     | AD, ID, vascular, inflammatory syndromes               | Chronic vascular and immune abnormalities                                                | MC                |
| <i>TP53</i>    | Tumor predisposition, ID, metabolic disorders          | Systemic instability, immune compromise [8]                                              | MC; D; MG; DG; GC |
| <i>YWHAG</i>   | Neurodevelopmental, CV, COPD                           | Respiratory and neurological symptoms [66,68]                                            | DG; MC; D         |

**Abbreviations:** \*Databases: MC: MalaCards; D: DISEASES; DG: DISGENET; MG: MedGen; GC: GenCC. CDL: Cornelia de Lange; ID: Immunodeficiency; AD: Autoimmune Disease; CTD: Connective Tissue Disorder; MetS: Metabolic Syndrome; CV: Cardiovascular diseases; ATD: Autoimmune Thyroid Disease; CMS: Congenital Myasthenic Syndrome; POTS: Postural Orthostatic Tachycardia Syndrome; IBD: Inflammatory Bowel Disease; COPD: Chronic Obstructive Pulmonary Disease. Long-COVID overlap descriptions are supported by representative studies [8,66–68]; identical patterns share the same citation.

<https://doi.org/10.1371/journal.pcbi.1013725.t002>

autoimmune, connective tissue, and neurodevelopmental disorders that share clinical or biological features with Long COVID manifestations [8,66,67].

A subset of these genes (*CDKN1A*, *CREBBP*, *CSNK2A1*, and *TP53*) is involved in tumor-predisposition syndromes and complex developmental disorders with autoimmune and inflammatory components. Aberrant cytokine signaling and dysregulated immune checkpoints of these conditions suggest potential mechanisms for the prolonged inflammatory responses observed in Long COVID [8]. Similarly, genes such as *C19orf18*, *CDC26*, *MORN3*, *NDUFA6*, *VWDE*, and *YWHAG* are linked to systemic conditions that affect multiple organ systems. Their association with mitochondrial dysfunction and vascular pathologies parallels fatigue, dysautonomia, and endothelial dysfunction, which are commonly reported in Long COVID [66].

*ATOSA* and *GMPPB* are linked to chronic inflammation, mirroring the mechanisms of immune activation and tissue damage implicated in Long COVID. Additionally, *CERS4*, *ESR1*, *FYN*, and *MAPK1* highlight the interplay between immune dysfunction and metabolic disruption, shedding light on the metabolic dysregulation seen in some patients [67].

Our database integration analysis reveals meaningful biological connections between Long COVID and other disorders, particularly immune-mediated conditions and metabolic diseases. The identified genetic overlaps suggest that variants in these genes may influence individual susceptibility to persistent post-viral symptoms, as they do in other chronic



conditions. These shared molecular features help explain the diverse manifestations observed in patients with Long COVID [68].

**Genetic risk and protective factors in Long COVID susceptibility.** Among the 32 putative causal genes obtained from our framework, we identified 16 significant protein-coding genes directly associated with the risk and protection of Long COVID. These genes are involved in critical biological processes such as cell cycle regulation (*CDC26*), apoptosis (*BNIP1*), and immune response (*BTN3A1*) (Table 3).

The forest plot (Fig 4) reveals a wide range of effect sizes for 16 protein-coding genes, from -30.04 for *CDC26* to 34.22 for *MORN4*, indicating varying degrees of influence on Long COVID susceptibility. Through our framework, we identified statistically significant causal relationships for these genes ( $p$ -value and FDR < 0.05), with confidence intervals that do not cross zero, providing strong evidence for their potential roles. In particular, genes such as *MORN4*, *CDC26*, *EIF5A* and *VWDE* exhibit the strongest causal associations, with the largest absolute effect sizes.

In our framework, we used varying numbers of SNPs as IVs for each gene's expression, ranging from 2 SNPs for genes like *MORN4*, *CDC26*, *EIF5A*, *GMPPB*, and *NDUFA6*, to 18 SNPs for *MORN3*. These IVs strengthen the validity of our causal estimates of the relationship between gene expression and the Long COVID risk. The number of tissues in which gene expression was evaluated also varied by gene, enhancing the robustness of our findings in different biological contexts. For instance, *MORN4* showed expression changes in two tissues/cells (left ventricle and thyroid) and in cultured fibroblasts. In contrast, *CDA* demonstrated widespread effects, modulating gene expression across 26 distinct tissues. These included multiple organ systems: adipose, neural, cardiovascular, endocrine, connective, immune, digestive, reproductive, renal, and hematopoietic tissues. This extensive distribution highlights the systemic impact of SNPs on gene expression regulation.

Moreover, the expression patterns of all 16 risk and protective protein-coding genes identified through our framework suggest a systemic involvement in Long COVID. Ten genes showed expression in both both lung and other tissues, while six genes were expressed exclusively in non-lung tissues. This distribution of expression patterns across other non-lung tissues supports the presence of non-respiratory symptoms observed in Long COVID patients, suggesting the involvement of molecular mechanisms beyond the pulmonary system [69].

Directional effects vary among genes, with some showing positive effect sizes (e.g., *ATOSA*, *BNIP1*, *C19orf18*, *EIF5A*, *GMPPB*, *MORN3*, *MORN4*, *NDUFA6*, and *VWDE*) and others negative effect sizes (e.g., *ADAT1*, *BOLA2*, *BTN3A1*, *CDA*, *CDC26*, *CERS4*, and *ITPRID1*). Genes with positive effect sizes suggest that increased expression in relevant tissues is

**Table 3. Risk and protective putative causal genes for Long COVID ordered by the  $S_{\text{Causal}}$  score.** Genes are classified as risk or protective factors for Long COVID based on their effect size sign (positive or negative, respectively) when  $\alpha = 1$ .

| Rank | Gene            | Description                                 | Effect     | Score |
|------|-----------------|---------------------------------------------|------------|-------|
| 1    | <i>MORN4</i>    | MORN Repeat Containing 4                    | Risk       | 1.000 |
| 2    | <i>CDC26</i>    | Cell Division Cycle 26                      | Protective | 0.878 |
| 3    | <i>EIF5A</i>    | Eukaryotic Translation Initiation Factor 5A | Risk       | 0.614 |
| 4    | <i>VWDE</i>     | Von Willebrand Factor D And EGF Domain      | Risk       | 0.453 |
| 5    | <i>GMPPB</i>    | GDP-Mannose Pyrophosphorylase B             | Risk       | 0.388 |
| 6    | <i>NDUFA6</i>   | NADH Dehydrogenase Subunit A6               | Risk       | 0.286 |
| 7    | <i>BNIP1</i>    | BCL2 Interacting Protein 1                  | Risk       | 0.263 |
| 8    | <i>CERS4</i>    | Ceramide Synthase 4                         | Protective | 0.228 |
| 9    | <i>ADAT1</i>    | Adenosine Deaminase Acting on tRNA 1        | Protective | 0.225 |
| 10   | <i>C19orf18</i> | Chromosome 19 Open Reading Frame 18         | Risk       | 0.225 |
| 11   | <i>BOLA2</i>    | BolA Family Member 2                        | Protective | 0.179 |
| 12   | <i>CDA</i>      | Cytidine Deaminase                          | Protective | 0.177 |
| 13   | <i>MORN3</i>    | MORN Repeat Containing 3                    | Risk       | 0.143 |
| 14   | <i>ITPRID1</i>  | ITPR Interacting Domain Containing 1        | Protective | 0.142 |
| 15   | <i>BTN3A1</i>   | Butyrophilin Subfamily 3 Member A1          | Protective | 0.141 |
| 16   | <i>ATOSA</i>    | Atos Homolog A                              | Risk       | 0.064 |

<https://doi.org/10.1371/journal.pcbi.1013725.t003>

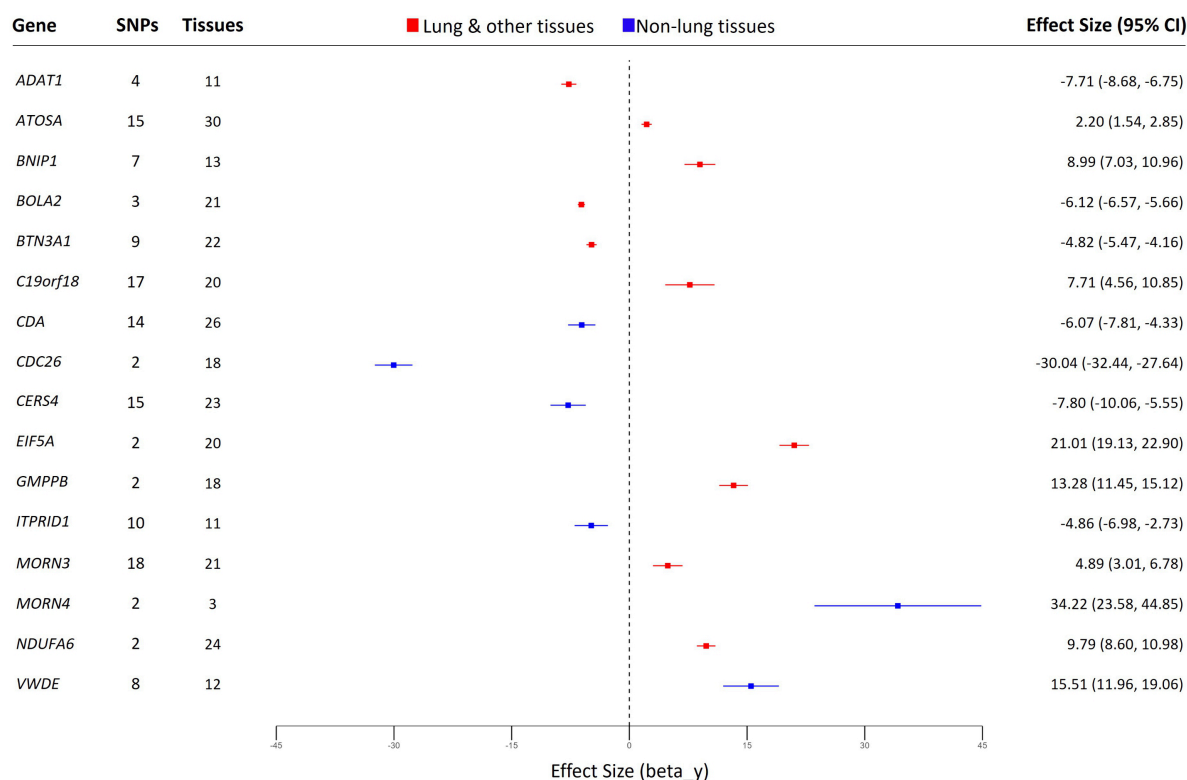

**Fig 4. Effect size of the risk and protective putative causal genes for Long COVID.** Forest plot shows the significant genes identified at  $\alpha = 1.0$ , with all causal relationships meeting statistical significance (p-value and FDR < 0.05). Higher expression is associated with increased (positive effect size) or decreased (negative effect size) risk. SNPs: number of associated SNPs; Tissues: number of tissues where the SNPs influence the gene expression. Points show fixed effect size (standardized beta coefficient) with 95% CI error bars. Red bars: lung and other tissues; Blue bars: non-lung tissues. **Abbreviations:** GWAS: Genome-Wide Association Study. SNP: Single Nucleotide Polymorphism. FDR: False Discovery Rate. CI: Confidence Interval.

<https://doi.org/10.1371/journal.pcbi.1013725.g004>

associated with a higher susceptibility to Long COVID. In contrast, those with negative effect sizes indicate that increased expression may reduce the risk or be protective against Long COVID.

Among these 16 protein-coding genes, the roles of *BTN3A1*, *EIF5A*, and *NDUFA6* were previously identified in the pathogenesis of COVID-19, suggesting a potential link between their expression and the development of Long COVID. [37,42,51] (Table 4).

*BTN3A1*, an immune system protein involved in T-cell activation and regulation, is part of a 5-gene signature that predicts ventilator-free days in patients with COVID-19 [37]. Our analysis revealed a negative effect size value for *BTN3A1*, suggesting that higher expression is causally associated with better clinical outcomes and a potentially reduced risk of Long COVID. This protective effect may be attributed to its role in promoting a more controlled immune response, thereby reducing long-term complications [70].

In contrast, *EIF5A*, a translation factor that promotes programmed ribosomal frameshifting (PRF), translation termination, and ribosome recycling in SARS-CoV-2 infection, showed a positive effect size value. This function suggests that *EIF5A* may contribute to persistent symptoms in Long COVID by causing ongoing disruptions in translation regulation and protein synthesis, leading to continued immune activation and cellular stress [42].

**Table 4. Summary of three putative causal genes with established links to COVID-19 and hypothesized effects in Long COVID.** Additional related literature and references are available in the [S3 Table](#).

| Gene          | General Function                                                                     | Role in COVID-19                                                                           | Long COVID Impact                                                    |
|---------------|--------------------------------------------------------------------------------------|--------------------------------------------------------------------------------------------|----------------------------------------------------------------------|
| <i>BTN3A1</i> | T-cell activation and regulation [72]                                                | Part of 5-gene signature; higher expression correlates with more ventilator-free days [37] | Higher expression may reduce risk via improved immune regulation     |
| <i>EIF5A</i>  | Translation regulation, protein synthesis, virus response, cell differentiation [73] | Promotes PRF, translation termination, and ribosome recycling in SARS-CoV-2 [42]           | May contribute to persistent symptoms due to enhanced viral response |
| <i>NDUFA6</i> | NADH dehydrogenase activity, electron transport, energy production [73]              | Top ten hub gene, significant mRNA differences [51]                                        | Disruptions may increase risk by impacting cardiovascular health     |

**Abbreviations:** COVID-19: Coronavirus Disease 2019; PRF: Programmed Ribosomal Frameshifting.

<https://doi.org/10.1371/journal.pcbi.1013725.t004>

*NDUFA6*, a key component of the mitochondrial respiratory chain, has been identified among the main genes associated with SARS-CoV-2 infection [51], showing significant differences in gene expression in affected patients. Our findings suggest that changes in *NDUFA6* can negatively impact cardiovascular health and increase the risk of Long COVID. These effects are likely attributable to the critical role of the gene in cellular energy production and mitochondrial function. *NDUFA6*-affected activity can lead to reduced ATP synthesis, increased oxidative stress, and the development of cardiovascular symptoms that are frequently observed in patients with Long COVID [71].

These findings suggest that *BTN3A1*, *EIF5A*, and *NDUFA6* play a significant role in the pathogenesis of COVID-19 with implications for the development of Long COVID. *BTN3A1* appears to confer protective effects through controlled immune responses, potentially reducing the risk of Long COVID. In contrast, *EIF5A* and *NDUFA6* can contribute to persistent symptoms by disrupting translation regulation and impaired mitochondrial function, respectively.

In addition to the three previously mentioned genes, our framework identified 13 novel risk and protective putative causal genes for Long COVID. Among these genes, *CDA*, *ADAT1*, *CERS4*, *CDC26* and *BOLA2* were enriched mainly in our analyzes with significant roles in crucial pathways, including nucleotide metabolism, RNA editing, lipid metabolism, cell cycle regulation, and iron-sulfur cluster assembly [5,74–80].

*CDA* and *ADAT1* are both involved in nucleotide metabolism and RNA editing processes. *CDA* is crucial for the salvage of pyrimidine and the balance of the nucleotide pool, potentially affecting the integrity of the RNA and the function of the immune system [74]. Similarly, *ADAT1* is involved in pre-mRNA editing, converting adenosine to inosine in eukaryotic tRNA, potentially influencing inflammatory responses [75]. Their roles as risk factors can be hypothesized based on their participation in these critical cellular processes, which could contribute to the persistent symptoms observed in patients with Long COVID [5].

*CERS4* and *BOLA2* are involved in cellular metabolism and homeostasis. *CERS4* facilitates sphingosine N-acyltransferase activity and is implicated in ceramide synthesis, influencing lipid metabolism and cellular signaling pathways [76]. *BOLA2* works in iron maturation and is part of the iron-sulfur cluster assembly complex, playing a role in cell redox homeostasis [77]. The association of risk with these genes might be related to their impact on various cellular processes, including signaling pathways and cellular respiration. Its role may be associated with the various symptoms observed in Long COVID cases [78].

*CDC26* is part of the anaphase-promoting complex (APC) involved in cell cycle regulation [79]. Its role as a risk factor can be attributed to its function as a ubiquitin-protein ligase, which manages the proteolysis of cell cycle proteins. This could alter cellular repair and regeneration processes, possibly explaining the prolonged cellular damage observed in individuals with Long COVID [80].

The detailed results of the pathway EA using the GO, KEGG and Reactome databases, including significantly enriched biological processes, molecular functions, cellular components, and pathways, are detailed in [S4 Table](#).

**Network driver genes that control Long COVID network.** Our multi-omics framework identified 16 putative causal genes that function as network drivers in Long COVID. In CT, such drivers represent critical nodes whose manipulation manages the overall state and dynamics of the system, regulating numerous downstream genes and pathways. By identifying these regulatory hubs, our approach reveals strategic intervention points that could restore normal function or mitigate disease effects, offering therapeutic targets to modify network behavior and clinical outcomes [14].

The identified core network driver genes have at least 150 connections to other nodes, which highlights their significant influence. Disruption of these genes under normal conditions could contribute to the pathogenesis of Long COVID, making them potential therapeutic targets to restore normal function in affected patients (Table 5).

Of the 16 identified network driver genes, 14 were associated with pathways enriched for COVID-19, Long COVID, or both. These pathways involve essential cellular functions, including cell proliferation, differentiation, cell cycle progression, DNA repair, inflammation, and immune responses. Disruptions in these processes can lead to persistent symptoms of Long COVID, chronic inflammation, neurodegeneration, and immune dysfunction (Table 6).

The extensive findings of our functional enrichment studies on these putative causal genes of network drivers, obtained from GO, KEGG, and Reactome, are presented in detail in the S4 Table.

In Fig 5, we provide a detailed example of *CREBBP*, one of the genes identified by our framework and confirmed in the literature. This gene was chosen because of its larger number of connections compared to other genes, highlighting its essential role in the network. The plots of the other identified network driver protein-coding genes for Long COVID are provided in S1 Fig.

## Gene expression clustering reveals Long COVID subtypes

We clustered Long COVID patients into subgroups using gene expression data from the 32 putative causal genes identified in our framework. Moreover, we hypothesized that distinct gene expression patterns of risk and protective genes, as well as network driver genes, underlie different clinical characteristics in patients. Using Consensus Clustering (ConC) [34], we identified subgroups of patients who demonstrated coherent clustering and balanced distributions (i.e., not skewed toward a single subset).

**Table 5. Network driver genes for Long COVID ordered by the  $S_{\text{Causal}}$  score.** The  $K$  column represents the total degree (total interactions),  $K_{\text{in}}$  describes the in-degree (incoming interactions), and  $K_{\text{out}}$  denotes the out-degree (outgoing interactions).

| Rank | Gene           | Description                                  | $K$ | $K_{\text{in}}$ | $K_{\text{out}}$ | Score |
|------|----------------|----------------------------------------------|-----|-----------------|------------------|-------|
| 1    | <i>TP53</i>    | Tumor Protein p53                            | 299 | 196             | 103              | 1.000 |
| 2    | <i>CREBBP</i>  | CREB Binding Protein                         | 273 | 153             | 120              | 0.913 |
| 3    | <i>EP300</i>   | E1A Binding Protein p300                     | 270 | 162             | 108              | 0.903 |
| 4    | <i>YWHAG</i>   | 14-3-3 Protein Gamma                         | 252 | 180             | 72               | 0.843 |
| 5    | <i>SMAD3</i>   | SMAD Family Member 3                         | 225 | 143             | 82               | 0.753 |
| 6    | <i>GRB2</i>    | Growth Factor Receptor Bound 2               | 210 | 96              | 114              | 0.702 |
| 7    | <i>SRC</i>     | SRC Proto-Oncogene                           | 195 | 92              | 103              | 0.652 |
| 8    | <i>AR</i>      | Androgen Receptor                            | 179 | 112             | 67               | 0.599 |
| 9    | <i>ESR1</i>    | Estrogen Receptor 1                          | 174 | 68              | 106              | 0.582 |
| 10   | <i>RB1</i>     | Retinoblastoma 1                             | 169 | 106             | 63               | 0.565 |
| 11   | <i>CSNK2A1</i> | Casein Kinase-2 $\alpha$ -1                  | 165 | 89              | 76               | 0.552 |
| 12   | <i>SMAD2</i>   | SMAD Family Member 2                         | 161 | 99              | 62               | 0.538 |
| 13   | <i>CDKN1A</i>  | Cyclin-Dependent Kinase Inhibitor 1 $\alpha$ | 158 | 108             | 50               | 0.528 |
| 14   | <i>MAPK1</i>   | Mitogen-Activated Protein Kinase 1           | 157 | 80              | 77               | 0.525 |
| 15   | <i>FYN</i>     | FYN Proto-Oncogene                           | 153 | 63              | 90               | 0.512 |
| 16   | <i>HDAC1</i>   | Histone Deacetylase 1                        | 151 | 95              | 56               | 0.505 |

**Abbreviations:**  $K$ : total degree (all interactions);  $K_{\text{in}}$ : in-degree (incoming interactions);  $K_{\text{out}}$ : out-degree (outgoing interactions).

<https://doi.org/10.1371/journal.pcbi.1013725.t005>

**Table 6. Long COVID roles of the identified network driver genes.** Key protein functions and enriched pathways obtained from GO, KEGG, or Reactome, along with their roles in COVID-19 and Long COVID pathogenesis. All pathway enrichments meet statistical significance thresholds (p-value and FDR < 0.05).

| Gene          | Function                                                           | Paths | Main Path                                                   | Roles                                                                          | Ref. |
|---------------|--------------------------------------------------------------------|-------|-------------------------------------------------------------|--------------------------------------------------------------------------------|------|
| <i>AR</i>     | Steroid-hormone transcription factor, regulates cell proliferation | 88    | Regulation of miRNA transcription                           | Affects TMPRSS2 and ACE2 expression, linked to persistent symptoms in males    | [81] |
| <i>CDKN1A</i> | Inhibits CDKs, regulates cell cycle                                | 152   | p53 signaling pathway                                       | Involved in SARS-CoV-2 entry, tissue damage, fibrosis                          | [82] |
| <i>CREBBP</i> | Acetyltransferase, regulates gene expression                       | 118   | Histone acetyltransferase activity                          | Controls inflammation, may trigger neurodegeneration                           | [41] |
| <i>EP300</i>  | Acetyltransferase, regulates cell growth                           | 184   | Histone acetyltransferase activity                          | Regulates ACE2, critical in inflammation, persistent immune responses          | [44] |
| <i>ESR1</i>   | Estrogen receptor, regulates transcription                         | 113   | Intracellular estrogen receptor signaling pathway           | Protective against COVID-19, reduces inflammation, immune dysfunction in women | [83] |
| <i>FYN</i>    | Non-receptor kinase, regulates immune response                     | 115   | Immune response-regulating signaling pathway                | Regulates inflammation, may be linked to immune dysregulation                  | [62] |
| <i>HDAC1</i>  | Histone deacetylase, modulates gene expression                     | 98    | Regulation of apoptotic signaling pathway                   | Modulates inflammation and apoptosis in COVID-19                               | [84] |
| <i>MAPK1</i>  | Kinase involved in signal transduction                             | 246   | Immune response-activating signaling pathway                | Controls inflammation and cytokine responses in COVID-19                       | [85] |
| <i>RB1</i>    | Tumor suppressor, regulates cell cycle                             | 25    | Regulation of apoptotic signaling pathway                   | May interact with viral mechanisms, potential oncogenic effects                | [53] |
| <i>SMAD2</i>  | Mediates TGF- $\beta$ signals, regulates cell growth               | 114   | TGF- $\beta$ receptor signaling pathway                     | Involved in fibrosis and other complications post-COVID                        | [82] |
| <i>SMAD3</i>  | Mediates TGF- $\beta$ signals, regulates cell differentiation      | 168   | miRNA transcription                                         | Linked to pulmonary fibrosis, impacts post-COVID severity                      | [82] |
| <i>SRC</i>    | Non-receptor kinase, regulates gene transcription                  | 257   | Immune response-regulating signaling pathway                | Mediates viral entry, chronic inflammation, immune dysregulation               | [57] |
| <i>TP53</i>   | Tumor suppressor, regulates apoptosis and DNA repair               | 263   | Intrinsic apoptotic signaling pathway (DNA damage response) | Influences cytokine release, immune response in COVID-19                       | [86] |
| <i>YWHAG</i>  | Adapter protein in signaling pathways                              | 26    | PI3K-Akt signaling pathway                                  | Involved in cell survival, inflammation, and immune responses in COVID-19      | [87] |

**Abbreviations:** GO: Gene Ontology; KEGG: Kyoto Encyclopedia of Genes and Genomes; Reactome: Reactome Pathway Database; FDR: False Discovery Rate.

<https://doi.org/10.1371/journal.pcbi.1013725.t006>

The analysis identified three distinct Long COVID subtypes, aligning with the findings of the three groups reported in previous research [5,66], each with high ASW values indicating robust clustering: Cluster 1 included 65 individuals (ASW: 0.93), Cluster 2 contained 53 individuals (ASW: 0.85), and Cluster 3 consisted of 36 individuals (ASW: 0.75).

Table 7 presents the comprehensive distribution of symptom frequencies in the three clusters, providing context for the clinical heterogeneity observed in our cohort. We performed a direct differential expression analysis as shown in Fig 6. These putative causal genes exhibited distinct expression patterns across all subtypes, highlighting their potential role in distinguishing symptom profiles. To explore this further, we map symptom prevalence within groups to evaluate whether gene expression patterns align reliably with the identified symptoms. Significant differences in symptom distributions (p-value < 0.05) were observed, with symptoms grouped into broader categories, including respiratory, gastrointestinal, neurological, metabolic, psychological, dental, and sleep-related problems, allowing for a comprehensive comparison between groups. Table 8 complements this analysis by summarizing the key genes identified per cluster, including differentially expressed genes, their regulatory patterns, biological functions, and associated enriched pathways that contribute to the distinct manifestations of Long COVID symptoms [21]. Details of the RNA-seq and clinical datasets used in this analysis are provided in the Methods section.



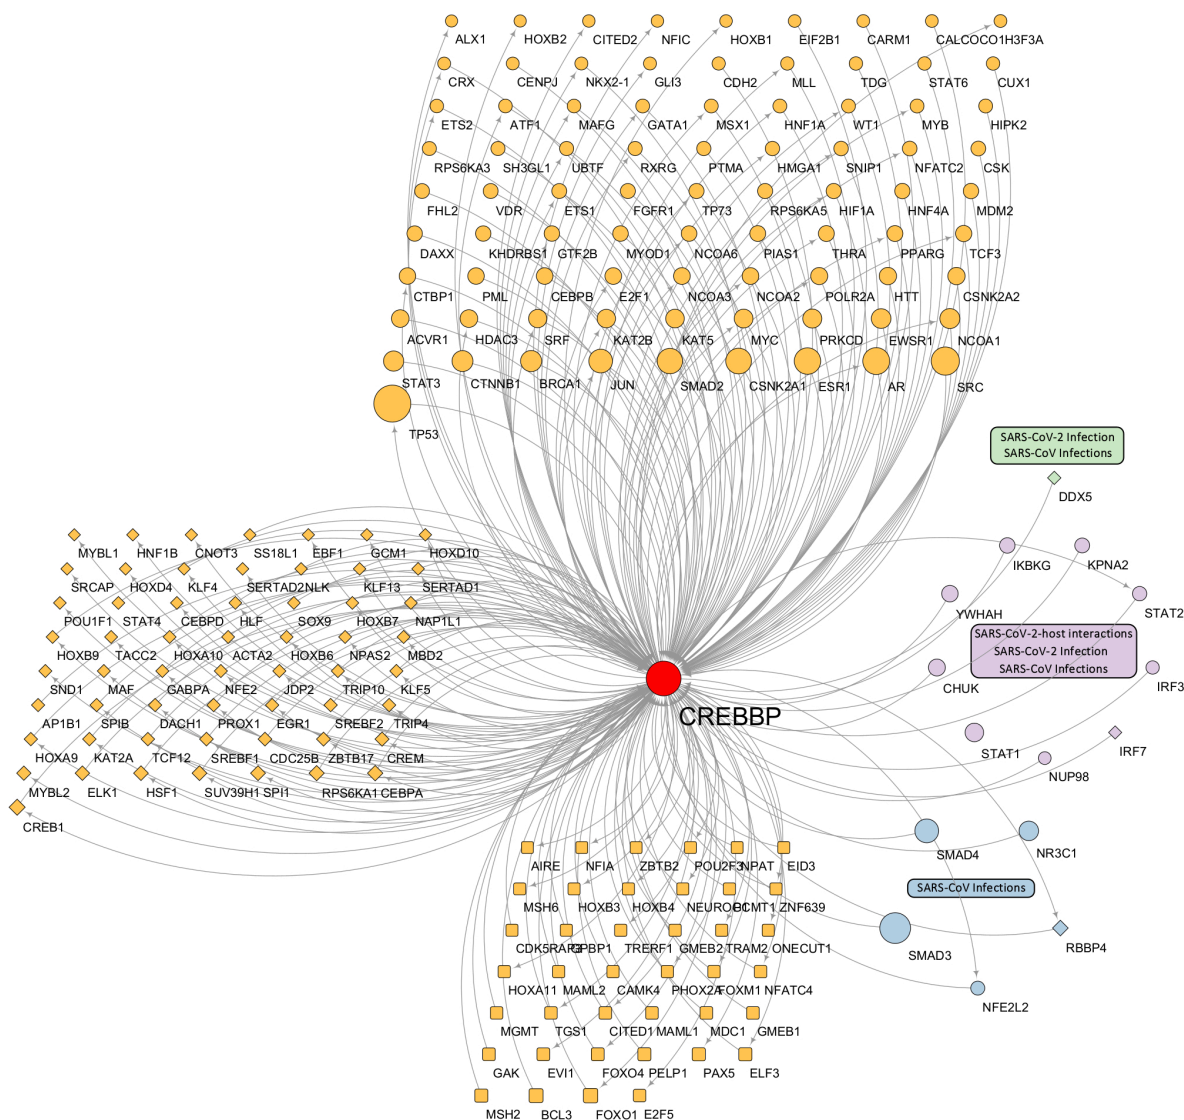

**Fig 5. Network plot highlighting a network driver gene for Long COVID.** Our analysis identified *CREBBP* as a key network driver gene for Long COVID, supported by existing literature, with 273 total interactions (153 incoming, 120 outgoing). Connected genes are represented by three shapes based on network control properties: ellipses for critical genes (removal increases the required driver nodes), diamonds for ordinary genes (removal maintains the driver nodes), and round rectangles for redundant genes (removal preserves the control). The three most enriched pathways are shown in green, purple, and blue, with node sizes proportional to their K-degree (network connectivity).

<https://doi.org/10.1371/journal.pcbi.1013725.g005>

Cluster 1 showed a symptom profile dominated by respiratory problems and sleep disturbances. Increased mucus was reported by 29.23% of patients in this cluster, significantly higher than in cluster 2 (15.09%) and cluster 3 (16.67%) ( $\chi^2$   $p$ -value =  $1.07 \times 10^{-41}$ , adjusted  $p$ -value =  $1.18 \times 10^{-40}$ ). Lung (23.08%) and smell and/or taste problems (20.00%) were similarly more prevalent in cluster 1 ( $\chi^2$   $p$ -value =  $7.69 \times 10^{-7}$ , adjusted  $p$ -value =  $1.21 \times 10^{-6}$ ;  $\chi^2$   $p$ -value =  $8.23 \times 10^{-15}$ , adjusted  $p$ -value =  $2.59 \times 10^{-14}$ , respectively). Sleep problems were also more common in cluster 1 (49.23%) compared to cluster 2 (28.30%) and cluster 3 (33.33%) ( $\chi^2$   $p$ -value =  $9.98 \times 10^{-33}$ , adjusted  $p$ -value =  $5.49 \times 10^{-32}$ ), in agreement with previous reports indicating sleep disturbances as key features of specific Long COVID phenotypes [88]. This pattern is consistent with multiple cluster analyses that identify distinct respiratory and fatigue-related symptom groups [5,66]. The

**Table 7. Cluster-specific symptom prevalence in Long COVID patients.** This table highlights the most characteristic symptoms for each cluster, showing count and percentage (in parentheses) of patients experiencing each symptom. Symptoms are listed in order of prevalence within each cluster to emphasize the cluster-defining characteristics. Complete clinical data and statistical comparisons are available in [S5 Table](#) and [S2 Fig](#).

| <b>C1: Respiratory-Sleep</b>          | <b>Count (%)</b> | <b>Key Characteristics</b> |
|---------------------------------------|------------------|----------------------------|
| Weakness or Fatigue                   | 40 (52.6)        | Predominant fatigue        |
| Memory/Thought Problems               | 39 (51.3)        | Cognitive symptoms         |
| Sleep Problems                        | 37 (48.7)        | Sleep disturbances         |
| Eating More/Less                      | 34 (44.7)        | Appetite changes           |
| Muscle Pain                           | 33 (43.4)        | Physical discomfort        |
| Shortness of Breath                   | 26 (34.2)        | Respiratory issues         |
| Chest Pain/Cardiac Issues             | 22 (28.9)        | Cardiac symptoms           |
| Increased Mucus                       | 21 (27.6)        | Respiratory secretions     |
| Lung Problems                         | 16 (21.1)        | Pulmonary complications    |
| <b>C2: Neuropsychological-Dental</b>  | <b>Count (%)</b> | <b>Key Characteristics</b> |
| Eating More/Less                      | 34 (43.6)        | Appetite dysregulation     |
| Weakness or Fatigue                   | 33 (42.3)        | General fatigue            |
| Memory/Thought Problems               | 30 (38.5)        | Cognitive impairment       |
| Muscle Pain                           | 29 (37.2)        | Musculoskeletal pain       |
| Shortness of Breath                   | 24 (30.8)        | Respiratory symptoms       |
| Sleep Problems                        | 22 (28.2)        | Sleep disorders            |
| Anxiety/Depression                    | 17 (21.8)        | Psychological symptoms     |
| Chest Pain/Cardiac Issues             | 16 (20.5)        | Cardiac manifestations     |
| Increased Mucus                       | 12 (15.4)        | Respiratory secretions     |
| Cavities/Teeth Problems               | 11 (14.1)        | Dental complications       |
| <b>C3: Gastrointestinal-Metabolic</b> | <b>Count (%)</b> | <b>Key Characteristics</b> |
| Eating More/Less                      | 17 (47.2)        | Metabolic dysregulation    |
| Weakness or Fatigue                   | 15 (41.7)        | General fatigue            |
| Nausea/Diarrhea/Vomiting              | 14 (38.9)        | GI disturbances            |
| Memory/Thought Problems               | 12 (33.3)        | Cognitive symptoms         |
| Muscle Pain                           | 12 (33.3)        | Physical discomfort        |
| Sleep Problems                        | 12 (33.3)        | Sleep disturbances         |
| Headaches                             | 12 (33.3)        | Neurological symptoms      |
| Anxiety/Depression                    | 9 (25.0)         | Psychological symptoms     |
| Shortness of Breath                   | 9 (25.0)         | Respiratory symptoms       |
| Chest Pain/Cardiac Issues             | 8 (22.2)         | Cardiac symptoms           |

**Abbreviation:** C: Cluster. GI: Gastrointestinal.

<https://doi.org/10.1371/journal.pcbi.1013725.t007>

corresponding gene expression profile revealed elevated expression of *CREBBP*, *GRB2*, *MAPK1*, and *SMAD2*, which are involved in inflammatory responses, stress adaptation, and TGF- $\beta$  signaling pathways associated with respiratory function and sleep regulation. These molecular findings suggest that the genes selected in cluster 1 effectively captured the biological mechanisms underlying the respiratory and sleep-related symptoms of this group.

A higher prevalence of psychological symptoms and dental problems characterized the second group. Anxiety and depression were observed in 37.74% of the patients, slightly higher than in cluster 1 (36.92%) and significantly higher than in cluster 3 (25.00%) ( $\chi^2$  *p*-value = 0.0082, *adjusted p*-value = 0.0106). Cavities and tooth problems affected 18.87% of the patients in cluster 2, compared to 13.85% in cluster 1 and 5.56% in cluster 3 ( $\chi^2$  *p*-value =  $2.32 \times 10^{-9}$ , *adjusted p*-value =  $4.65 \times 10^{-9}$ ). The gene expression analysis in cluster 2 revealed upregulation of *CDC26*, *CDKN1A*, *ESR1*, and *YWHAG*, genes associated with cell cycle regulation, stress response, and inflammation control, respectively. In particular, *ESR1* has been implicated in psychiatric disorders, and *YWHAG* is known to modulate multiple signaling pathways relevant to mood regulation [89]. The prominence of neuropsychological symptoms in this cluster aligns with other Long COVID clustering studies that have identified distinct neurocognitive and mood-related phenotypes [5,66]. Furthermore, recent studies suggest an interplay between COVID-19 and the deterioration of oral health, providing a rationale for the

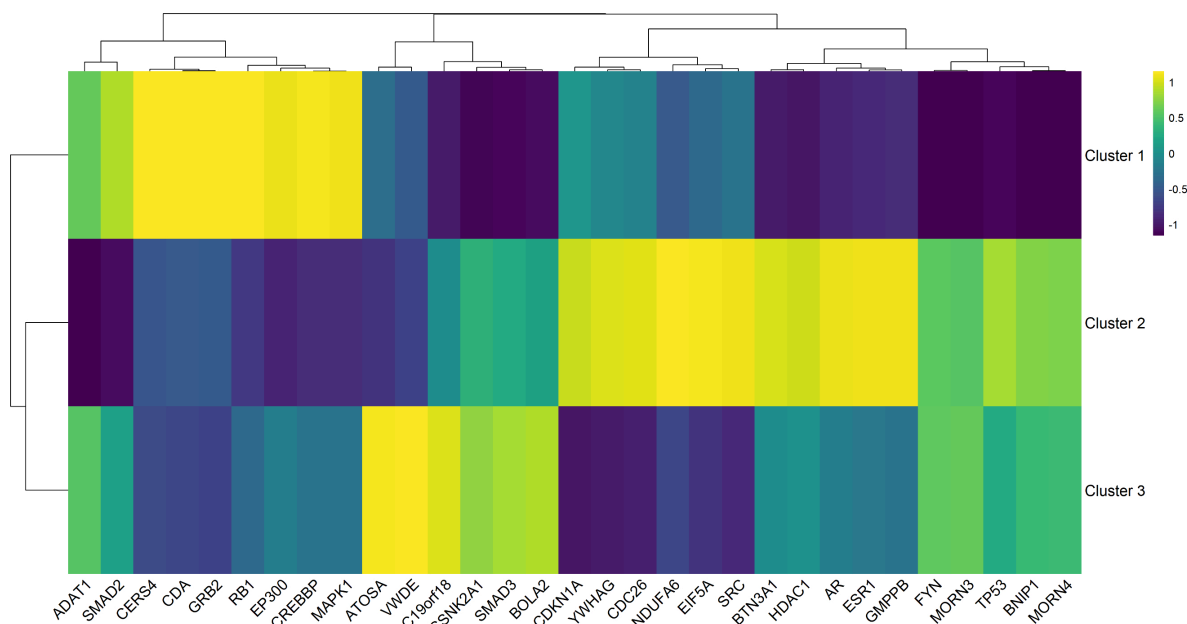

**Fig 6. Cluster-level heat-map of the 32 candidate Long-COVID genes.** The heat-map shows the mean gene expression for each cluster, highlighting distinct expression patterns across the three patient groups. Hierarchical clustering of genes (shown at top) reveals coordinated expression patterns. The color gradient represents z-scored  $\log_2$  expression values (viridis color scale: dark-purple = low expression, bright-yellow = high expression), demonstrating cluster-specific gene signatures associated with different Long COVID phenotypes. A sample-level heat-map showing individual subject gene expression is available in [S5 Table](#) and [S2 Fig](#).

<https://doi.org/10.1371/journal.pcbi.1013725.g006>

increased dental problems in cluster 2 [90]. These findings reflect the biological mechanisms behind the psychological and dental symptoms of this group.

Cluster 3 was defined by gastrointestinal symptoms (GI) and metabolic disturbances. A significant 38.89% of patients in this cluster experienced nausea, diarrhea, and/or vomiting, higher than in cluster 1 (13.85%) and cluster 2 (7.55%) ( $\chi^2$   $p$ -value =  $1.37 \times 10^{-116}$ , *adjusted p*-value =  $3.02 \times 10^{-115}$ ). Eating more or less was reported by 47.22% of patients in cluster 3, comparable to cluster 1 (47.69%) but higher than cluster 2 (37.74%) ( $\chi^2$   $p$ -value =  $1.56 \times 10^{-13}$ , *adjusted p*-value =  $4.29 \times 10^{-13}$ ). Headaches were also more common in cluster 3 (33.33%) compared to cluster 1 (30.77%) and cluster 2 (22.64%) ( $\chi^2$   $p$ -value =  $2.19 \times 10^{-20}$ , *adjusted p*-value =  $8.02 \times 10^{-20}$ ). The gene expression profile showed downregulation of *HDAC1*, *SRC*, and *TP53*, along with upregulation of *NDUFA6*, genes associated with metabolic regulation, immune response, and cellular stress pathways. These alterations are correlated with evidence of persistent metabolic and immune dysregulation in Long COVID [67]. The prominent GI issues are consistent with the recognition of Long COVID clusters focused on GI [5,66], showing the heterogeneous nature of post-COVID symptom profiles. These molecular profiles are correlated with the GI and metabolic symptoms identified in group 3, highlighting the ability of these genes to capture the biological processes driving these manifestations.

Our demographic analysis did not reveal significant differences in key covariates between the three identified symptom clusters. Age, sex, and smoking status were evenly distributed across clusters (all  $p$ -values > 0.1), indicating that the observed symptom differentiation was not attributable to these factors. We also conducted comprehensive statistical testing of multiple potential confounding variables using chi-squared tests, including race, pre-existing conditions such as asthma, cancer, diabetes, hypertension, and cardiovascular disorders, with none showing significant differences

**Table 8. Gene expression patterns, pathways, and symptoms across Long COVID clusters.** Cluster-specific genes highlight functions and enriched pathways associated with symptom persistence. This table shows relationships between clusters, symptoms, and pathways with significant biological relevance (p-values and FDR < 0.05).

| Clus. | Symptoms                                          | Gene          | Reg. | Function                                                          | Enriched Pathway                                                         |
|-------|---------------------------------------------------|---------------|------|-------------------------------------------------------------------|--------------------------------------------------------------------------|
| 1     | Respiratory issues, Sleep disturbances            | <i>CREBBP</i> | Up   | Transcriptional coactivator, hypoxia response                     | HIF-1 signaling: mediates cellular response to hypoxia                   |
|       |                                                   | <i>GRB2</i>   | Up   | Growth factor signaling mediator                                  | ErbB signaling: regulates cell survival and stress response              |
|       |                                                   | <i>MAPK1</i>  | Up   | Stress-responsive kinase                                          | MAPK signaling: controls cellular response to stress and inflammation    |
|       |                                                   | <i>SMAD2</i>  | Up   | Signal transducer in TGF- $\beta$ pathway, regulates inflammation | TGF- $\beta$ signaling: controls inflammatory response and tissue repair |
| 2     | Psychological symptoms, Dental issues             | <i>CDC26</i>  | Up   | Cell cycle regulator                                              | Controls cellular homeostasis                                            |
|       |                                                   | <i>CDKN1A</i> | Up   | Cell cycle regulator, Stress response                             | p53 signaling: mediates cellular stress response                         |
|       |                                                   | <i>ESR1</i>   | Up   | Nuclear receptor, inflammation control                            | Nuclear receptor signaling: regulates inflammatory responses             |
|       |                                                   | <i>YWHAG</i>  | Up   | Signal transduction regulator                                     | PI3K-Akt signaling: controls cell survival and stress adaptation         |
| 3     | Gastrointestinal symptoms, Metabolic disturbances | <i>HDAC1</i>  | Down | Epigenetic regulator                                              | Chromatin modification: regulates gene expression                        |
|       |                                                   | <i>NDUFA6</i> | Up   | Mitochondrial function                                            | Oxidative phosphorylation: controls energy metabolism                    |
|       |                                                   | <i>SRC</i>    | Down | Tyrosine kinase, immune regulation                                | Immune response signaling: controls inflammation                         |
|       |                                                   | <i>TP53</i>   | Down | Stress response regulator                                         | Apoptotic signaling: regulates cell death and survival                   |

**Abbreviations:** Clus.: Cluster; Reg.: Regulation; FDR: False Discovery Rate.

<https://doi.org/10.1371/journal.pcbi.1013725.t008>

between clusters (all p-value > 0.05), with the sole exception of ulcerative colitis (p-value = 0.016). This uniform distribution of demographic and clinical characteristics across clusters strengthens the biological validity of our gene expression-based clustering approach, suggesting that the observed symptom patterns reflect genuine molecular distinctions rather than artifacts of population stratification or comorbidity distribution.

Integrating symptom profiles with gene expression clustering demonstrates how our identified genes stratify Long COVID patients into biologically distinct groups, each cluster exhibiting unique symptom signatures. Cluster 1 exhibits predominantly respiratory and sleep disturbances, suggesting potential benefits from therapies targeting these pathways. Cluster 2 features psychological and dental problems, indicating the need for interventions that address stress-related pathways and oral health. Cluster 3 presents GI and metabolic symptoms, suggesting treatments focused on metabolic and digestive support. The alignment between gene functions and symptom distributions validates the biological relevance of these putative causal genes and their roles in initiating diverse clinical manifestations. More details, including complete statistical analyses and p-values, are available in [S5 Table](#).

## Discussion

Long COVID, or PASC, is a multisystemic disorder whose respiratory, neurological, cardiovascular, and gastrointestinal manifestations can persist for months after the acute phase [1,2,4–6]. Despite its growing clinical impact, decisive genetic drivers remain elusive. We address this gap with a multi-omics framework that combines TWMR with CT concepts to prioritize genes that show evidence of expression-mediated effects on disease risk and occupy critical positions within the network for controllability. By design, this framework identifies putative risk genes (strong cis-MR support) and network-driver genes (nodes whose removal increases the number of control inputs), yet allows the boundary to shift as stronger instruments and resources become available or as additional trans-eQTLs are identified. All input paths, LD

panels, and parameters, including the balancing factor  $\alpha$ , are exposed in the public code (<https://github.com/SindyPin/Causal-Multiomics-Method>) and the Shiny app (<https://sindypin.shinyapps.io/github/>), which allows users to reproduce or refine every result with a single configuration change.

Our study used publicly available meta-analyzed summary statistics, preventing direct severity-adjusted models that could unravel the Long COVID-specific genetic liability from severe acute disease effects. Although severity adjustment would theoretically provide this distinction, it risks collider bias if both host genetics and viral load independently influence the outcomes [91,92]. The GWAS dataset we used mitigated confounding through case-control designs comparing Long COVID patients with COVID-positive controls [17]. Clinical evidence supports Long COVID as distinct: 10-30% of non-hospitalized and up to 67% of mild-moderate cases develop persistent symptoms, the majority arising from mild rather than severe infections [93,94]. Our complementary approaches (TWMR for causal inference and CT for network regulation) capture Long COVID-specific mechanisms independent of acute severity pathways.

We used the publicly accessible COVID-19 Host Genetics Initiative dataset from Lammi *et al.* (2025) [17], which included 24 cohorts with broad ancestry diversity—critical given documented Long COVID disparities across populations. Although the larger 23andMe GWAS (54,000 cases, 120,000 controls) [95] offers superior statistical power and stronger MR instruments through population homogeneity and positive SARS-CoV-2 controls, it was not available during our analysis. Furthermore, the 23andMe cohort is predominantly of European ancestry, limiting its generalizability to the development of broadly applicable therapeutic strategies. In contrast, our chosen dataset's multi-ancestry composition better supports inclusive therapeutic development despite its smaller sample size.

The impact of ancestry on susceptibility to Long COVID, together with our genetic findings, deserves careful consideration for clinical translation. The Long COVID GWAS we analyzed included cases and COVID-19-positive controls from six ancestries (European, East Asian, American mixed, African, South Asian, and others) [17]. While European ancestry predominated, the inclusion of diverse populations allowed the discovery of cross-ancestry variation and highlighted important population-specific genetic differences. For example, risk allele frequencies can vary substantially by ancestry, as demonstrated by variants with frequencies ranging from 1.6% in non-Finnish Europeans to 36% in East Asians, highlighting the critical importance of ancestry-aware interpretation of genetic findings.

Our RNA-seq cohort represents individuals from diverse racial backgrounds, including Black or African American, Asian, White, American Indian/Alaska Native, Native Hawaiian or Other Pacific Islander, and those identifying with multiple races. This diversity strengthens the generalizability of our transcriptomic findings and ensures that ancestry-related biological variability is captured in our integrative framework. However, we acknowledge that the current genetic architecture of Long COVID may not fully capture population-specific susceptibility patterns, and future research should prioritize ancestry-stratified analyses to prevent exacerbating health disparities in the diagnosis and treatment of Long COVID.

The instrumental variants in our analysis were restricted to high-confidence cis-eQTLs ( $P < 5 \times 10^{-6}$ ,  $r^2 < 0.01$ ;  $F > 10$ ) to reduce the bias of weak instruments. Causal estimates were obtained using Mt-Robin, which reduces pleiotropic outliers through robust regression [11]. Our framework integrates TWMR and CT, as they identify causal genes from complementary perspectives and utilize different data types. TWMR uses GWAS and eQTL data, while CT relies on gene expression data and PPI networks, thus avoiding potential conflicts in data types and model assumptions. These methods operate at different analytical levels: TWMR identifies individual causal genes using genetic instruments in accordance with MR principles, while CT analyzes system-level regulatory effects using network topology assessment. This sequential design ensures that each method operates within its valid assumption framework. The implementation of Mt-Robin incorporates built-in robustness features through its resampling-based approach (10,000 iterations), which accounts for LD and tissue-tissue correlations, while explicitly modeling SNP-specific random effects ( $\theta_i$ ) to capture horizontal pleiotropy. This approach maintains type I error control even with up to 50% of instruments invalid. We acknowledge the limitations of using multi-tissue cis-eQTLs and have avoided trans-eQTLs in the current analysis due to their context specificity and low signal-to-noise ratio. However, the framework supports alternative eQTL files, including trans-eQTLs (e.g., eQTLGen), which users can incorporate to test the robustness of gene classifications across MR–CT boundaries.



Given the predominance of participants of European ancestry in GWAS discovery, our use of the GTEx-EUR LD reference aligns with the characteristics of the study population. The framework enables researchers to integrate alternative panels matched by ancestry with a straightforward configuration change before the LD-clumping step, enhancing flexibility for population-specific analyses and reducing potential LD mismatches. Despite the strengths of our approach, we acknowledge certain inherent limitations of the MR methodology, including effects on the population structure, potential unmeasured confounders, long-range LD patterns, and horizontal pleiotropy. Although we have implemented Mt-Robin and leave-one-out diagnostics to mitigate these concerns, the reported effect sizes should be interpreted as approximations of lifelong expression liability rather than definitive causal estimates.

A critical consideration in causal inference studies is whether the tissue sources of eQTL data align with the organ systems most affected by Long COVID. To address this, we deliberately selected cis-eQTL from 49 human tissues, ensuring a broad coverage of the principal organ systems implicated in the syndrome (S1 Text). Respiratory involvement is captured through lung tissue, directly reflecting the pulmonary manifestations commonly reported in Long COVID. Neurological symptoms are comprehensively represented through extensive coverage of brain regions, including the amygdala, anterior cingulate cortex, caudate, cerebellar hemisphere, cerebellum, cortex, frontal cortex, hippocampus, hypothalamus, nucleus accumbens, putamen, substantia nigra, and spinal cord, ensuring that central nervous system dysfunction is accurately depicted. Cardiovascular complications are addressed through various tissues, including the aorta, atrial appendage, coronary arteries, left ventricle, and tibial arteries. At the same time, immune dysregulation—a hallmark of Long COVID—is reflected in whole blood, EBV-transformed lymphocytes, and spleen tissue. This comprehensive tissue coverage increases the biological validity of our causal gene identification strategy, supporting the interpretation that our multi-omics integration captures expression patterns relevant to the multi-organ nature of Long COVID.

Our framework addresses batch effects by integrating data strategically and modularly rather than combining raw data across studies. We utilize summary statistics from GWAS and eQTL studies that incorporate study-specific corrections and quality control measures from the original analyses, ensuring that population structure and technical artifacts are handled within each component's validated statistical framework. The Mt-Robin method specifically addresses population structure through its resampling procedure (10,000 iterations) and LD-aware analysis, which accounts for genetic correlations and population stratification without requiring additional correction steps. This sequential integration approach, where the GWAS, eQTL, RNA-seq, and PPI data contribute to distinct analytical stages, prevents the propagation of batch effects while maintaining methodological integrity at each step.

This framework highlighted 32 genes whose combined MR and network evidence suggest that immune regulation, viral carcinogenesis, cell-cycle control, and metabolic adaptation contribute to Long-COVID pathophysiology. The list includes *TP53*, *CREBBP*, *EP300*, *SMAD3*, *GRB2*, and *YWHAG*, genes likely responsible for driving persistent inflammation, tissue remodeling, and immune exhaustion—mechanisms consistent with the omnigenic model, in which peripheral regulators collectively influence the core disease genes [96]. Enrichment analyses may inherit annotation bias from curated databases; cross-validation in independent omics layers will therefore be essential.

We designed our framework to be network-agnostic, allowing researchers to explore Long COVID causal genes using their preferred network resources while providing systematic validation across multiple databases. We compared results from our primary network (6,327 genes) [22] with the OmniPath database (4,789 genes) [97], which together share 3,027 overlapping genes. Controllability scores demonstrated substantial consistency, with a Spearman correlation of  $\rho = 0.61$  ( $p < 2.2 \times 10^{-16}$ ) for overlapping genes, indicating moderate to strong agreement despite differences in network topologies. This correlation validates the robustness of our approach while acknowledging that different PPI networks capture distinct interaction types. Our framework delivers this diversity by providing pre-processed versions of multiple networks and comparative visualization tools for multi-network validation (S6 Table and S3 Fig).

We use degree centrality solely to classify the selected driver genes, as it serves as a practical proxy for regulatory influence—genes with more downstream connections may affect broader regions of the network. This ranking is performed after identifying control-critical genes and is not used to determine driver status. Although betweenness or

eigenvector centrality could offer complementary insights, they are not directly related to the structural controllability framework proposed by Liu *et al.* (2011) [98], which forms the basis of our approach. Users may adapt the ranking method in the code to incorporate alternative centralities if desired.

Our fusion methodology is designed to combine the complementary strengths of MR and network approaches. The observed switching behavior across  $\alpha$  values reflects the distinct nature of the two scoring systems:  $S_{\text{Risk}}$  captures direct causal evidence through statistical significance thresholds from MR analysis, while  $S_{\text{Network}}$  identifies regulatory control points through network topology measures. When we systematically evaluated seven alternative normalization strategies (Min-Max, Box-Cox, Yeo-Johnson, Rank-Inverse Normal, Quantile, Asinh, and Rank-based transformations) across the full range of parameters  $\alpha$ , all approaches demonstrated similar transitions between gene sets, confirming that this behavior arises from inherent biological differences in what each method captures rather than methodological artifacts.

This complementary design allows researchers to explore the spectrum systematically—from genes with strong statistical causal evidence ( $\alpha \rightarrow 1$ ) to critical network regulators ( $\alpha \rightarrow 0$ ), using user-defined top- $K$  gene sets and normalization methods. Rather than artificially forcing the smooth mixing of incompatible scoring distributions, our approach preserves the interpretability of each methodology while enabling users to select the balance that aligns with their biological hypotheses and validation strategies. This flexibility represents a strength of the framework, as it acknowledges that causal genes and network drivers may represent distinct but equally important therapeutic target classes in complex diseases, such as Long COVID. The complete results of the normalization analysis are provided in [S7 Table](#) and [S4 Fig](#).

The adjustable parameter  $\alpha$  balances the MR and the network evidence. Setting  $\alpha = 1$  privileges genes with strong cis-MR support, making them suitable for hypothesis-driven validation studies;  $\alpha = 0$  favors regulators when the goal is to map the intervention points. A sweep of sensitivity ( $\Delta\alpha = 0.1$ ) shows that the top-ranked list is stable in  $0.3 \leq \alpha \leq 0.7$ . We encourage users to perform their own search on the  $\alpha$  grid depending on their research goals through our available Shiny app (<https://sindypin.shinyapps.io/github/>).

Our analysis identified three transcriptomic endotypes corresponding to distinct Long COVID profiles: respiratory-sleep, neuro-psychological/dental, and gastro-metabolic disturbances. However, we do not claim that these three subtypes represent the definitive structure of the syndrome. The number of clusters was chosen using internal pre-specified criteria (silhouette, size balance, and resampling stability); clinical symptom patterns were then interpreted *post hoc*. Consequently, the reported cluster-symptom associations should be read as conditional on the selected  $K$  and interpreted with appropriate caution regarding post-selection inference.

In practical terms, our goal was to stratify patients into clinically useful groups rather than to nominate single-gene biomarkers. Most of the 32 genes are not strongly associated with individual symptoms when tested individually ( $AR$  is the only exception). However, their joint expression pattern reliably distinguishes patient subgroups, consistent with post-viral biology, in which pathway-level (not single-gene) dysregulation dominates. This justifies our multigene integrative strategy and cautions against over-interpreting one-gene-at-a-time symptom associations.

Generalization remains a field-wide challenge. Currently, there are no publicly accessible whole-blood transcriptomic cohorts with patient-level symptom matrices that would permit a like-for-like external evaluation. We therefore provide all artifacts necessary for future validation—code, centroid coordinates, and a conservative assignment rule with an unclassified option—to facilitate prospective testing as appropriate datasets emerge. Meantime, we prioritize robustness checks that do not rely on outcome re-optimization, such as split-sample agreement and subsampling stability.

Clinically, these endotypes should be viewed as testable hypotheses that can guide trial design and biomarker development rather than as fixed diagnostic categories. They offer a principal method for (i) enriching trials for patients sharing dominant biological programs, (ii) aligning mechanistic studies with coherent patterns of symptoms, and (iii) developing explicit and auditable decision rules. Limitations include potential post-selection bias, cohort-specific effects, and the cross-sectional nature of transcriptomic sampling. Future work should include preregistered analysis plans for selection  $K$ , longitudinal stability of assignments, and multi-cohort, multi-tissue evaluations once compatible resources become available.

The 32 highlighted genes overlap disorders characterized by chronic inflammation, autoimmune dysregulation, and metabolic disturbance [66,67], suggesting that pre-existing genetic liabilities may influence susceptibility to Long COVID. Although overlap with other GWAS is limited, this may reflect differences in case definitions, statistical power, tissue models, and control strategies rather than false discoveries. We provide complete results for user inspection, reproducibility, and external validation.

Diagnostic panels that quantify gene expression, combined with machine-learning risk models, could facilitate the early identification of individuals at risk. Drug-repurposing screens that target high-priority driver genes offer a rational route to therapeutic discovery; however, *in vitro*, *in vivo*, and longitudinal validation will be essential before clinical translation.

## Conclusion

Our study presents a reproducible and extensible framework for putative causal gene discovery that integrates genetic, transcriptomic, and network control evidence. Although current Long-COVID GWAS resources are underpowered, the method is intentionally designed to be future-proof. By providing an open platform for iterative refinement, we lay the foundation for a community-based understanding of Long COVID genetics and a path toward precise evidence-based care.

## Supporting information

**S1 Text. GTEx v8 eQTL datasets.** Description of 49 GTEx tissue-specific cis-eQTL datasets (Version 8, Ensembl 99, GRCh38) encompassing 39,832 unique genes from nearly 1,000 healthy European individuals. All associations are significant (FDR < 0.05) within 1Mb of the transcription start site.

(PDF)

**S2 Text. Details of the Long COVID GWAS dataset.** Description of the Long COVID GWAS dataset (Release 7; Ensembl 109; GRCh38) from Lammi *et al.*, 2023, including 3,018 cases evaluated for 19 post-COVID symptoms and 1,093,995 controls across six ancestries. Provides complete lists of ancestries, symptoms, and unique SNPs analyzed.

(PDF)

**S3 Text. Whole Genome Sequencing (WGS) data for LD matrix calculation.** Description of GTEx WGS data (Ensembl 88, GRCh38) containing 820,792 unique SNPs from 836 European individuals used to calculate the linkage disequilibrium (LD) matrix. Details on data access and alternative reference panels matched with ancestry.

(PDF)

**S4 Text. Mount Sinai COVID-19 Biobank Study.** RNA-sequencing Data Description of RNA-sequencing gene expression data (GSE215865, Ensembl GRCh37) from 413 blood samples, including 158 Long COVID individuals (symptoms that persist > 1 month after infection), COVID-19 patients, and healthy controls.

(PDF)

**S5 Text. Protein-Protein Interaction (PPI) dataset.** Description of the human PPI dataset from Vinayagam *et al.* 2011, used as a model for building the Long COVID network.

(PDF)

**S6 Text. Integration analysis of polygenic risk score (PRS).** Description of integration analysis between 32 putative causal genes of Long COVID and three COVID-19 PRS datasets from the PGS Catalog (PGS002272, PGS002273, and PGS004938). Details on variant-to-gene mapping methodology using TSS-based mapping with LD clumping, statistical enrichment testing, and distance analysis between Long COVID genes and COVID-19 PRS variants.

(PDF)

**S7 Text. Methodological framework for Long COVID causal gene identification.** Complete description of the integrated MR and CT framework for identifying putative causal genes. Includes risk score calculation, network score calculation, final gene ranking methodology, enrichment analysis procedures, clustering, and validation approaches. (PDF)

**S1 Table. Shared genetic basis between Long COVID and related conditions.** Disease-gene associations compiled from five databases (MalaCards, DISEASES, DISGENET, MedGen, and GenCC) for genes identified in this study. Conditions were selected based on pathophysiological overlap with Long COVID, including immune/inflammatory components, chronic symptoms, multi-system involvement, and metabolic/endocrine disruptions. The table includes condition names, associated genes, primary pathophysiological mechanisms, and database sources. (XLSX)

**S2 Table. Instrumental variables (SNPs) for causal gene analysis.** Complete list of SNPs used as instrumental variables in the MR analysis for each identified gene. The table includes SNP identifiers, associated genes, and tissue-specific expression data. (TSV)

**S3 Table. Literature support for putative causal genes in COVID-19 and Long COVID.** Summary of putative causal genes with established links to COVID-19 and hypothesized effects in Long COVID. Includes gene functions, mechanisms, and supporting references. (MD)

**S4 Table. Results of enrichment analysis for putative causal genes of Long COVID.** Significantly enriched terms and pathways from the GO, KEGG, and Reactome databases. Includes biological processes, molecular functions, cellular components, pathways with associated gene counts, enrichment statistics (p-value, p-adjust, q-value), and gene lists. (XLSX)

**S5 Table. Complete clinical data and statistical comparisons for Long COVID clusters.** Comprehensive symptom prevalence data for all three Long COVID clusters, including counts, percentages, and statistical test results (Chi-square and Fisher's exact tests). Contains complete demographic information and all clinical variables analyzed across clusters. (XLSX)

**S6 Table. Statistical analysis and multi-network validation.** Statistical test results of gene rankings across multiple PPI networks demonstrating framework robustness. (XLSX)

**S7 Table. Normalization and analysis of the sensitivity of the parameter  $\alpha$**  Complete results of gene rankings by different normalization methods and values of the parameter  $\alpha$  (0, 0.25, 0.50, 0.75, 1.0), including sets of the K gene and comparative statistics that demonstrate the flexibility of the framework. (CSV)

**S1 Fig. Network plots for Long COVID driver genes. Network visualizations for all identified protein-coding genes of the network driver showing protein-protein interactions, connectivity patterns, and network topology for each gene.** (PDF)

**S2 Fig. Sample-level gene expression heatmap for Long COVID clusters.** Individual patient-level heatmap showing expression patterns of the 32 candidate Long COVID genes across all samples. Color gradient represents z-scored  $\log_2$  expression values with hierarchical clustering of both genes and samples.

(PDF)

**S3 Fig. Multi-network validation visualization.** Comparative visualization of gene rankings and controllability scores across multiple PPI networks, demonstrating framework robustness and network-specific differences in topology and interaction coverage.

(PDF)

**S4 Fig. Visualization of gene ranking in normalization methods.** Visualization of the consistency of gene ranking across different normalization approaches and parameter settings ( $\alpha$ ), spanning from statistical causal evidence to network-based prioritization.

(PDF)

## Acknowledgments

The authors thank our colleagues and collaborators for their insightful feedback during the study design and synthesis phases. The authors also acknowledge institutional support from the University of South Australia.

## Author contributions

**Conceptualization:** Jiuyong Li, Thuc Duy Le.

**Data curation:** Sindy Pinero.

**Formal analysis:** Sindy Pinero, Xiaomei Li.

**Funding acquisition:** Thuc Duy Le.

**Investigation:** Sindy Pinero.

**Methodology:** Sindy Pinero, Xiaomei Li, Thuc Duy Le.

**Project administration:** Thuc Duy Le.

**Resources:** Jiuyong Li, Sang Hong Lee, Thuc Duy Le.

**Software:** Sindy Pinero.

**Supervision:** Thuc Duy Le.

**Validation:** Xiaomei Li, Lin Liu, Sang Hong Lee, Marnie Winter, Thin Nguyen, Junpeng Zhang.

**Visualization:** Sindy Pinero.

**Writing – original draft:** Sindy Pinero.

**Writing – review & editing:** Sindy Pinero, Xiaomei Li, Lin Liu, Jiuyong Li, Sang Hong Lee, Marnie Winter, Thin Nguyen, Junpeng Zhang, Thuc Duy Le.

## References

1. World Health Organization WHO. 2021. [cited 2025 Jan 14]. <https://www.who.int/teams/health-care-readiness/post-covid-19-condition>
2. Centers for Disease Control and Prevention CDC. 2023. [cited 2025 Jan 14]. <https://www.cdc.gov/coronavirus/2019-ncov/long-term-effects/index.html>



3. National Institute for Health and Care Excellence (NICE). COVID-19 rapid guideline: managing the long-term effects of COVID-19. National Institute for Health and Care Excellence (NICE); 2024.
4. Petersen EL, Goßling A, Adam G, Aepfelbacher M, Behrendt C-A, Cavus E, et al. Multi-organ assessment in mainly non-hospitalized individuals after SARS-CoV-2 infection: The Hamburg City Health Study COVID programme. *Eur Heart J*. 2022;43(11):1124–37. <https://doi.org/10.1093/eurheartj/ehab914> PMID: 34999762
5. Davis HE, Assaf GS, McCorkell L, Wei H, Low RJ, Re'em Y, et al. Characterizing long COVID in an international cohort: 7 months of symptoms and their impact. *EClinicalMedicine*. 2021;38:101019. <https://doi.org/10.1016/j.eclinm.2021.101019> PMID: 34308300
6. Munblit D, O'Hara ME, Akrami A, Perego E, Olhio P, Needham DM. Long COVID: aiming for a consensus. *Lancet Respir Med*. 2022;10(7):632–4. [https://doi.org/10.1016/S2213-2600\(22\)00135-7](https://doi.org/10.1016/S2213-2600(22)00135-7) PMID: 35525253
7. Khullar D, Zhang Y, Zang C, Xu Z, Wang F, Weiner MG, et al. Racial/ethnic disparities in post-acute sequelae of SARS-CoV-2 infection in New York: an EHR-based cohort study from the RECOVER Program. *J Gen Intern Med*. 2023;38(5):1127–36. <https://doi.org/10.1007/s11606-022-07997-1> PMID: 36795327
8. Lai Y-J, Liu S-H, Manachevakul S, Lee T-A, Kuo C-T, Bello D. Biomarkers in long COVID-19: a systematic review. *Front Med (Lausanne)*. 2023;10:1085988. <https://doi.org/10.3389/fmed.2023.1085988> PMID: 36744129
9. Gasperi C, Chun S, Sunyaev SR, Cotsapas C. Shared associations identify causal relationships between gene expression and immune cell phenotypes. *Commun Biol*. 2021;4(1):279. <https://doi.org/10.1038/s42003-021-01823-w> PMID: 33664438
10. Galán M, Vigón L, Fuertes D, Murciano-Antón MA, Casado-Fernández G, Domínguez-Mateos S, et al. Persistent overactive cytotoxic immune response in a spanish cohort of individuals with long-COVID: identification of diagnostic biomarkers. *Front Immunol*. 2022;13:848886. <https://doi.org/10.3389/fimmu.2022.848886> PMID: 35401523
11. Gleason KJ, Yang F, Chen LS. A robust two-sample transcriptome-wide Mendelian randomization method integrating GWAS with multi-tissue eQTL summary statistics. *Genet Epidemiol*. 2021;45(4):353–71. <https://doi.org/10.1002/gepi.22380> PMID: 33834509
12. Friedman N, Linial M, Nachman I, Pe'er D. Using Bayesian networks to analyze expression data. *J Comput Biol*. 2000;7(3–4):601–20. <https://doi.org/10.1089/106652700750050961> PMID: 11108481
13. Chaudhary MS, Pham VVH, Le TD. NIBNA: a network-based node importance approach for identifying breast cancer drivers. *Bioinformatics*. 2021;37(17):2521–8. <https://doi.org/10.1093/bioinformatics/btab145> PMID: 33677485
14. Vinayagam A, Gibson TE, Lee H-J, Yilmazel B, Roesel C, Hu Y, et al. Controllability analysis of the directed human protein interaction network identifies disease genes and drug targets. *Proc Natl Acad Sci U S A*. 2016;113(18):4976–81. <https://doi.org/10.1073/pnas.1603992113> PMID: 27091990
15. Pham VVH, Liu L, Bracken CP, Goodall GJ, Long Q, Li J, et al. CBNA: a control theory based method for identifying coding and non-coding cancer drivers. *PLoS Comput Biol*. 2019;15(12):e1007538. <https://doi.org/10.1371/journal.pcbi.1007538> PMID: 31790386
16. GTEx Portal. type [Broad Institute and GTEx Consortium]; 2023 [cited 2023 Sept 08]. <https://gtexportal.org/home/datasets>.
17. Lammi V, Nakanishi T, Jones SE, Andrews SJ, Karjalainen J, Cortés B, et al. Genome-wide association study of long COVID. *Nat Genet*. 2025;57(6):1402–17. <https://doi.org/10.1038/s41588-025-02100-w> PMID: 40399555
18. Ensembl. type. [Ensembl Project, EMBL-EBI and Wellcome Sanger Institute; 2023 [cited 2023 Nov 05]. <https://asia.ensembl.org/index.html>
19. NCBI GEO. type [National Center for Biotechnology Information]; 2023 [cited 2023 Feb 11]. <https://www.ncbi.nlm.nih.gov/geo/query/acc.cgi?acc=GSE215865>.
20. GTEx Consortium. The GTEx Consortium atlas of genetic regulatory effects across human tissues. *Science*. 2020;369(6509):1318–30. <https://doi.org/10.1126/science.aaz1776> PMID: 32913098
21. Thompson RC, Simons NW, Wilkins L, Cheng E, Del Valle DM, Hoffman GE, et al. Molecular states during acute COVID-19 reveal distinct etiologies of long-term sequelae. *Nat Med*. 2023;29(1):236–46. <https://doi.org/10.1038/s41591-022-02107-4> PMID: 36482101
22. Vinayagam A, Stelzl U, Foulle R, Plassmann S, Zenkner M, Timm J, et al. A directed protein interaction network for investigating intracellular signal transduction. *Sci Signal*. 2011;4(189):rs8. <https://doi.org/10.1126/scisignal.2001699> PMID: 21900206
23. Lambert SA, Gil L, Jupp S, Ritchie SC, Xu Y, Buniello A, et al. The Polygenic Score Catalog as an open database for reproducibility and systematic evaluation. *Nat Genet*. 2021;53(4):420–5. <https://doi.org/10.1038/s41588-021-00783-5> PMID: 33692568
24. Privé F, Arbel J, Vilhjálmsdóttir BJ. LDpred2: better, faster, stronger. *Bioinformatics*. 2021;36(22–23):5424–31. <https://doi.org/10.1093/bioinformatics/btaa1029> PMID: 33326037
25. Kent WJ, Sugnet CW, Furey TS, Roskin KM, Pringle TH, Zahler AM, et al. The human genome browser at UCSC. *Genome Res*. 2002;12(6):996–1006. <https://doi.org/10.1101/gr.229102> PMID: 12045153
26. Weizmann Institute of Science. MalaCards. [cited 2025 Jan 13]. <https://www.malacards.org>
27. Novo Nordisk Foundation Center for Protein Research U of C. Diseases database. [cited 2025 Jan 13]. <https://diseases.jensenlab.org/Search>
28. DisGeNET. type [IMIM, UPF, and partners]; 2025 [cited 2025 Jan 13]. <https://www.disgenet.org>
29. MedGen. type [National Center for Biotechnology Information (NCBI)]; 2025 [cited 2025 Jan 13]. <https://www.ncbi.nlm.nih.gov/medgen>
30. GenCC. type [GenCC Consortium]; 2025 [cited 2025 Jan 13]. <https://thegencc.org>
31. The Gene Ontology Consortium. The Gene Ontology knowledgebase in 2023. *Genetics*. 2023;224(1).

32. Kanehisa M, Goto S. KEGG: kyoto encyclopedia of genes and genomes. *Nucleic Acids Res.* 2000;28(1):27–30. <https://doi.org/10.1093/nar/28.1.27> PMID: 10592173
33. Gillespie M, Jassal B, Stephan R, Milacic M, Rothfels K, Senff-Ribeiro A, et al. The reactome pathway knowledgebase 2022. *Nucleic Acids Res.* 2022;50(D1):D687–92. <https://doi.org/10.1093/nar/gkab1028> PMID: 34788843
34. Xu T, Le T. Type [Bioconductor] . 2017. <https://bioconductor.org/packages/CancerSubtypes>
35. Bravaccini S, Fonzi E, Tebaldi M, Angeli D, Martinelli G, Nicolini F, et al. Estrogen and androgen receptor inhibitors: unexpected allies in the fight against COVID-19. *Cell Transplant.* 2021;30:963689721991477. <https://doi.org/10.1177/0963689721991477> PMID: 33522308
36. Çetin Z, Bayrak T, Oğul H, Saygılı El, Akkol EK. Predicted SARS-CoV-2 miRNAs associated with epigenetic viral pathogenesis and the detection of new possible drugs for covid-19. *Curr Drug Deliv.* 2021;18(10):1595–610. <https://doi.org/10.2174/1567201818666210301102320> PMID: 33645482
37. Ni J-X, Qian Y-B, Zhang Y-W. Identification and development of a five-gene signature to improve the prediction of mechanical ventilator-free days for patients with COVID-19. *Eur Rev Med Pharmacol Sci.* 2023;27(2):805–17. [https://doi.org/10.26355/eurrev\\_202301\\_31082](https://doi.org/10.26355/eurrev_202301_31082) PMID: 36734721
38. D'Agno F, Walters K-A, Xiao Y, Sheng Z-M, Scherler K, Park J, et al. Lung epithelial and endothelial damage, loss of tissue repair, inhibition of fibrinolysis, and cellular senescence in fatal COVID-19. *Sci Transl Med.* 2021;13(620):eabj7790. <https://doi.org/10.1126/scitranslmed.abj7790> PMID: 34648357
39. Villacampa A, Shamooun L, Valencia I, Morales C, Figueiras S, de la Cuesta F, et al. SARS-CoV-2 S protein reduces cytoprotective defenses and promotes human endothelial cell senescence. *Aging Dis.* 2024;16(3):1626–38. <https://doi.org/10.14336/AD.2024.0405> PMID: 39012668
40. Temerozo JR, Sacramento CQ, Fintelman-Rodrigues N, Pão CRR, de Freitas CS, Dias SSG, et al. VIP plasma levels associate with survival in severe COVID-19 patients, correlating with protective effects in SARS-CoV-2-infected cells. *J Leukoc Biol.* 2022;111(5):1107–21. <https://doi.org/10.1002/JLB.5COVA1121-626R> PMID: 35322471
41. Wu Y, Angelov B, Deng Y, Fujino T, Hossain MS, Drechsler M, et al. Sustained CREB phosphorylation by lipid-peptide liquid crystalline nanoassemblies. *Commun Chem.* 2023;6(1):241. <https://doi.org/10.1038/s42004-023-01043-9> PMID: 37932487
42. Rehfeld F, Eitson JL, Ohlson MB, Chang T-C, Schoggins JW, Mendell JT. CRISPR screening reveals a dependency on ribosome recycling for efficient SARS-CoV-2 programmed ribosomal frameshifting and viral replication. *Cell Rep.* 2023;42(2):112076. <https://doi.org/10.1016/j.celrep.2023.112076> PMID: 36753415
43. Vann KR, Acharya A, Jang SM, Lachance C, Zandian M, Holt TA, et al. Binding of the SARS-CoV-2 envelope E protein to human BRD4 is essential for infection. *Structure.* 2022;30(9):1224–1232.e5. <https://doi.org/10.1016/j.str.2022.05.020> PMID: 35716662
44. Iosef C, Knauer MJ, Nicholson M, Van Nynatten LR, Cepinskas G, Draghici S, et al. Plasma proteome of Long-COVID patients indicates HIF-mediated vasculo-proliferative disease with impact on brain and heart function. *J Transl Med.* 2023;21(1):377. <https://doi.org/10.1186/s12967-023-04149-9> PMID: 37301958
45. Herichová I, Jendrisková S, Pídková P, Kršková L, Olexová L, Morová M, et al. Effect of 17 $\beta$ -estradiol on the daily pattern of ACE2, ADAM17, TMPRSS2 and estradiol receptor transcription in the lungs and colon of male rats. *PLoS ONE.* 2022;17(6):e0270609. <https://doi.org/10.1371/journal.pone.0270609>
46. Sonkar C, Doharey PK, Rathore AS, Singh V, Kashyap D, Sahoo AK, et al. Repurposing of gastric cancer drugs against COVID-19. *Comput Biol Med.* 2021;137:104826. <https://doi.org/10.1016/j.combiomed.2021.104826> PMID: 34537409
47. Ren J, Deng G, Li R, Jin X, Liu J, Li J, et al. Possible pharmacological targets and mechanisms of sivelestat in protecting acute lung injury. *Comput Biol Med.* 2024;170:108080. <https://doi.org/10.1016/j.combiomed.2024.108080> PMID: 38306776
48. Aydemir MN, Aydemir HB, Korkmaz EM, Budak M, Cekin N, Pinarbasi E. Computationally predicted SARS-COV-2 encoded microRNAs target NFKB, JAK/STAT and TGFB signaling pathways. *Gene Rep.* 2021;22:101012. <https://doi.org/10.1016/j.genrep.2020.101012> PMID: 33398248
49. Trionfetti F, Alonzi T, Bontempi G, Terri M, Battistelli C, Montaldo C, et al. HDAC1-3 inhibition increases SARS-CoV-2 replication and productive infection in lung mesothelial and epithelial cells. *Front Cell Infect Microbiol.* 2023;13:1257683. <https://doi.org/10.3389/fcimb.2023.1257683> PMID: 38162580
50. Chen H, Zhang L, Xu C, Shen X, Lou J, Wu S. Analysing transcriptomic signatures and identifying potential genes for the protective effect of inactivated COVID-19 vaccines. *PeerJ.* 2023;11:e15155. <https://doi.org/10.7717/peerj.15155> PMID: 37096063
51. Chu Y, Li M, Sun M, Wang J, Xin W, Xu L. Gene crosstalk between COVID-19 and preeclampsia revealed by blood transcriptome analysis. *Front Immunol.* 2024;14:1243450. <https://doi.org/10.3389/fimmu.2023.1243450> PMID: 38259479
52. Policard M, Jain S, Rego S, Dakshanamurthy S. Immune characterization and profiles of SARS-CoV-2 infected patients reveals potential host therapeutic targets and SARS-CoV-2 oncogenesis mechanism. *Virus Res.* 2021;301:198464. <https://doi.org/10.1016/j.virusres.2021.198464> PMID: 34058265
53. Alpalhão M, Ferreira JA, Filipe P. Persistent SARS-CoV-2 infection and the risk for cancer. *Med Hypotheses.* 2020;143:109882. <https://doi.org/10.1016/j.mehy.2020.109882> PMID: 32485314
54. Das A, Meng W, Liu Z, Hasib MM, Galloway H, Ramos da Silva S, et al. Molecular and immune signatures, and pathological trajectories of fatal COVID-19 lungs defined by in situ spatial single-cell transcriptome analysis. *J Med Virol.* 2023;95(8):e29009. <https://doi.org/10.1002/jmv.29009> PMID: 37563850
55. Zhang L, Zhu K, Xu J, Chen X, Sheng C, Zhang D, et al. Acetyltransferases CBP/p300 control transcriptional switch of  $\beta$ -catenin and stat1 promoting osteoblast differentiation. *J Bone Miner Res.* 2023;38(12):1885–99. <https://doi.org/10.1002/jbmr.4925> PMID: 37850815

56. Meyer B, Chiaravalli J, Gellenoncourt S, Brownridge P, Bryne DP, Daly LA, et al. Characterising proteolysis during SARS-CoV-2 infection identifies viral cleavage sites and cellular targets with therapeutic potential. *Nat Commun.* 2021;12(1):5553. <https://doi.org/10.1038/s41467-021-25796-w> PMID: 34548480
57. Norris EG, Pan XS, Hocking DC. Receptor-binding domain of SARS-CoV-2 is a functional  $\alpha\nu$ -integrin agonist. *J Biol Chem.* 2023;299(3):102922. <https://doi.org/10.1016/j.jbc.2023.102922> PMID: 36669646
58. Major J, Crotta S, Llorian M, McCabe TM, Gad HH, Priestnall SL, et al. Type I and III interferons disrupt lung epithelial repair during recovery from viral infection. *Science.* 2020;369(6504):712–7. <https://doi.org/10.1126/science.abc2061> PMID: 32527928
59. Heydemann L, Ciurkiewicz M, Beythien G, Becker K, Schughart K, Stanelle-Bertram S, et al. Hamster model for post-COVID-19 alveolar regeneration offers an opportunity to understand post-acute sequelae of SARS-CoV-2. *Nat Commun.* 2023;14(1):3267. <https://doi.org/10.1038/s41467-023-39049-5> PMID: 37277327
60. Vavougiou GD. SARS-CoV-2 dysregulation of PTBP1 and YWHAZ gene expression: a primer of neurodegeneration. *Med Hypotheses.* 2020;144:110212. <https://doi.org/10.1016/j.mehy.2020.110212> PMID: 33254518
61. Yu G, He Q-Y. ReactomePA: an R/Bioconductor package for reactome pathway analysis and visualization. *Mol Biosyst.* 2016;12(2):477–9. <https://doi.org/10.1039/c5mb00663e> PMID: 26661513
62. Weisberg E, Parent A, Yang PL, Sattler M, Liu Q, Liu Q, et al. Repurposing of kinase inhibitors for treatment of COVID-19. *Pharm Res.* 2020;37(9):167. <https://doi.org/10.1007/s11095-020-02851-7> PMID: 32778962
63. Fracchia KM, Pai CY, Walsh CM. Modulation of T cell metabolism and function through calcium signaling. *Front Immunol.* 2013;4:324. <https://doi.org/10.3389/fimmu.2013.00324> PMID: 24133495
64. GeneCards. type [Weizmann Institute of Science]; 2025 [cited 2025 Sept]. <https://www.genecards.org/cgi-bin/carddisp.pl?gene=ITPR1D1>
65. Mameri H, Bièche I, Meseure D, Marangoni E, Buhagiar-Labarchède G, Nicolas A, et al. Cytidine deaminase deficiency reveals new therapeutic opportunities against cancer. *Clin Cancer Res.* 2017;23(8):2116–26. <https://doi.org/10.1158/1078-0432.CCR-16-0626> PMID: 27601591
66. Niewolik J, Mikuteit M, Klawitter S, Schröder D, Stölting A, Vahldiek K, et al. Cluster analysis of long COVID symptoms for deciphering a syndrome and its long-term consequence. *Immunol Res.* 2024;72(4):605–13. <https://doi.org/10.1007/s12026-024-09465-w> PMID: 38627327
67. Wang Z, Gao H. Anti-inflammatory or anti-SARS-CoV-2 ingredients in Huashi Baidu Decoction and their corresponding targets: Target screening and molecular docking study. *Arab J Chem.* 2023;16(5):104663. <https://doi.org/10.1016/j.arabjc.2023.104663> PMID: 36816510
68. Subramanian A, Nirantharakumar K, Hughes S, Myles P, Williams T, Gokhale KM, et al. Symptoms and risk factors for long COVID in non-hospitalized adults. *Nat Med.* 2022;28(8):1706–14. <https://doi.org/10.1038/s41591-022-01909-w> PMID: 35879616
69. Boehm JW, Lee J, Jones D, Freedman DE. Prevalence and risk factors for gastrointestinal symptoms after recovery from COVID-19. *Neurogastroenterology and Motility.* 2022;34(3).
70. Gay L, Rouviere M-S, Mezouar S, Richaud M, Gorvel L, Foucher E, et al. Vy9V $\delta$ 2 T-cells are potent inhibitors of SARS-CoV-2 replication and represent effector phenotypes in patients with COVID-19. *J Infect Dis.* 2024;229(6):1759–69. <https://doi.org/10.1093/infdis/jiae169> PMID: 38557809
71. DePace NL, Colombo J. Long-COVID syndrome and the cardiovascular system: a review of neurocardiologic effects on multiple systems. *Curr Cardiol Rep.* 2022;24(11):1711–26. <https://doi.org/10.1007/s11886-022-01786-2> PMID: 36178611
72. Messal N, Mamessier E, Sylvain A, Celis-Gutierrez J, Thibault M-L, Chetaille B, et al. Differential role for CD277 as a co-regulator of the immune signal in T and NK cells. *Eur J Immunol.* 2011;41(12):3443–54. <https://doi.org/10.1002/eji.201141404> PMID: 21918970
73. Loeffen JL, Triepels RH, van den Heuvel LP, Schuelke M, Buskens CA, Smeets RJ, et al. cDNA of eight nuclear encoded subunits of NADH:ubiquinone oxidoreductase: human complex I cDNA characterization completed. *Biochem Biophys Res Commun.* 1998;253(2):415–22. <https://doi.org/10.1006/bbrc.1998.9786> PMID: 9878551
74. Gemble S, Ahuja A, Buhagiar-Labarchède G, Onclercq-Delic R, Dairou J, Biard DSF, et al. Pyrimidine pool disequilibrium induced by a cytidine deaminase deficiency inhibits PARP-1 activity, leading to the under replication of DNA. *PLoS Genet.* 2015;11(7):e1005384. <https://doi.org/10.1371/journal.pgen.1005384> PMID: 26181065
75. Maas S, Gerber AP, Rich A. Identification and characterization of a human tRNA-specific adenosine deaminase related to the ADAR family of pre-mRNA editing enzymes. *Proc Natl Acad Sci U S A.* 1999;96(16):8895–900. <https://doi.org/10.1073/pnas.96.16.8895> PMID: 10430867
76. Chalfant C, Poeta MD. Sphingolipids as signaling and regulatory molecules. New York:Springer. 2010. <https://doi.org/10.1007/978-1-4419-6741-1>
77. Frey AG, Palenchar DJ, Wildemann JD, Philpott CC. A glutaredoxin-BolA complex serves as an iron-sulfur cluster chaperone for the cytosolic cluster assembly machinery. *J Biol Chem.* 2016;291(43):22344–56. <https://doi.org/10.1074/jbc.M116.744946> PMID: 27519415
78. Sudre CH, Murray B, Varsavsky T, Graham MS, Penfold RS, Bowyer RC, et al. Attributes and predictors of long COVID. *Nat Med.* 2021;27(4):626–31. <https://doi.org/10.1038/s41591-021-01292-y> PMID: 33692530
79. Zhou Z, He M, Shah AA, Wan Y. Insights into APC/C: from cellular function to diseases and therapeutics. *Cell Div.* 2016;11:9. <https://doi.org/10.1186/s13008-016-0021-6> PMID: 27418942
80. Del Rio C, Collins LF, Malani P. Long-term health consequences of COVID-19. *JAMA.* 2020;324(17):1723–4. <https://doi.org/10.1001/jama.2020.19719> PMID: 33031513
81. Baratchian M, McManus JM, Berk MP, Nakamura F, Mukhopadhyay S, Xu W, et al. Androgen regulation of pulmonary AR, TMPRSS2 and ACE2 with implications for sex-discordant COVID-19 outcomes. *Sci Rep.* 2021;11(1):11130. <https://doi.org/10.1038/s41598-021-90491-1> PMID: 34045511

82. Wu C-T, Lidsky PV, Xiao Y, Cheng R, Lee IT, Nakayama T, et al. SARS-CoV-2 replication in airway epithelia requires motile cilia and microvillar reprogramming. *Cell*. 2023;186(1):112–130.e20. <https://doi.org/10.1016/j.cell.2022.11.030> PMID: 36580912
83. Liu F, Song C, Cai W, Chen J, Cheng K, Guo D, et al. Shared mechanisms and crosstalk of COVID-19 and osteoporosis via vitamin D. *Sci Rep*. 2022;12(1):18147. <https://doi.org/10.1038/s41598-022-23143-7> PMID: 36307516
84. Ripamonti C, Spadotto V, Pozzi P, Stevenazzi A, Vergani B, Marchini M, et al. HDAC inhibition as potential therapeutic strategy to restore the deregulated immune response in severe COVID-19. *Front Immunol*. 2022;13:841716. <https://doi.org/10.3389/fimmu.2022.841716> PMID: 35592335
85. Cusato J, Manca A, Palermi A, Mula J, Costanzo M, Antonucci M, et al. COVID-19: a possible contribution of the MAPK pathway. *Biomedicines*. 2023;11(5):1459. <https://doi.org/10.3390/biomedicines11051459> PMID: 37239131
86. Lee M, Lee SY, Bae Y-S. Functional roles of sphingolipids in immunity and their implication in disease. *Exp Mol Med*. 2023;55(6):1110–30. <https://doi.org/10.1038/s12276-023-01018-9> PMID: 37258585
87. Basile MS, Cavalli E, McCubrey J, Hernández-Bello J, Muñoz-Valle JF, Fagone P, et al. The PI3K/Akt/mTOR pathway: a potential pharmacological target in COVID-19. *Drug Discov Today*. 2022;27(3):848–56. <https://doi.org/10.1016/j.drudis.2021.11.002> PMID: 34763066
88. Crook H, Raza S, Nowell J, Young M, Edison P. Long covid-mechanisms, risk factors, and management. *BMJ*. 2021;374:n1648. <https://doi.org/10.1136/bmj.n1648> PMID: 34312178
89. Hwang WJ, Lee TY, Kim NS, Kwon JS. The role of estrogen receptors and their signaling across psychiatric disorders. *Int J Mol Sci*. 2020;22(1):373. <https://doi.org/10.3390/ijms22010373> PMID: 33396472
90. Dickson-Swift V, Kangutkar T, Knevel R, Down S. The impact of COVID-19 on individual oral health: a scoping review. *BMC Oral Health*. 2022;22(1):422. <https://doi.org/10.1186/s12903-022-02463-0> PMID: 36138456
91. Munafò MR, Tilling K, Taylor AE, Evans DM, Davey Smith G. Collider scope: when selection bias can substantially influence observed associations. *Int J Epidemiol*. 2018;47(1):226–35. <https://doi.org/10.1093/ije/dyx206> PMID: 29040562
92. Paternoster L, Tilling K, Davey Smith G. Genetic epidemiology and Mendelian randomization for informing disease therapeutics: conceptual and methodological challenges. *PLoS Genet*. 2017;13(10):e1006944. <https://doi.org/10.1371/journal.pgen.1006944> PMID: 28981501
93. Bell ML, Catalfamo CJ, Farland LV, Ernst KC, Jacobs ET, Klimentidis YC, et al. Post-acute sequelae of COVID-19 in a non-hospitalized cohort: Results from the Arizona CoVHORT. *PLoS One*. 2021;16(8):e0254347. <https://doi.org/10.1371/journal.pone.0254347> PMID: 34347785
94. Davis HE, McCorkell L, Moore Vogel J, Topol EJ. Long COVID: major findings, mechanisms and recommendations. *Nature Reviews Microbiology*. 2023.
95. Chaudhary NS, Weldon CH, Nandakumar P, Holmes MV, Aslibekyan S. Multi-ancestry GWAS of Long COVID identifies immune-related loci and etiological links to chronic fatigue syndrome, fibromyalgia and depression. Cold Spring Harbor Laboratory; 2024. <https://doi.org/10.1101/2024.10.07.24315052>
96. Boyle EA, Li YI, Pritchard JK. An expanded view of complex traits: from polygenic to omnigenic. *Cell*. 2017;169(7):1177–86. <https://doi.org/10.1016/j.cell.2017.05.038> PMID: 28622505
97. Türe D, Valdeolivas A, Gul L, Palacio-Escat N, Klein M, Ivanova O, et al. Integrated intra- and intercellular signaling knowledge for multicellular omics analysis. *Mol Syst Biol*. 2021;17(3):e9923. <https://doi.org/10.15252/msb.20209923> PMID: 33749993
98. Liu Y-Y, Slotine J-J, Barabási A-L. Controllability of complex networks. *Nature*. 2011;473(7346):167–73. <https://doi.org/10.1038/nature10011> PMID: 21562557
